# Supplementary material for: Modular promoter evolution shapes infection-specific transcription in oomycete effectors
Source: Research Square preprint supplement (doi:10.21203/rs.3.rs-7847175/v1), 2025-10-17
Supplement: Supplementary file 2 [file 93d4674872a913a9da054042.xlsx]

## Sheet: Summary_proteomes
Summarizing tables for putative effector prediction
SignalP 6.0 results (Secretion status analysis):
Species	Secreted	Non-Secreted	Total
Plasmopara halstedii	920	14454	15374
Phytophthora infestans	1723	15970	17693
Phytophthora sojae	2175	24295	26470
Hyaloperonospora arabidopsidis	1053	14151	15204
Pythium ultimum	707	13538	14245
WideEffHunter 1.0 results (Motifs and Domain analysis:
Species	Proteins Survived or retained
Plasmopara halstedii	9892
Phytophthora infestans	12157
Phytophthora sojae	17978
Hyaloperonospora arabidopsidis	9569
Pythium ultimum	9492
SignalP 6.0 results (detailed):
Genome	Category (SignalP 6.0)	Effector status	Prediction	Count	Percentage of total
Pl. halstedii	Secreted	Effector	SP+Glob	58	0.0042
	Secreted	Non-effector	SP+Glob	831	0.0604
	Secreted	Effector	SP+TM	0	0
	Secreted	Non-effector	SP+TM	11	0.0008
	Non-secreted	Effector	SP+Glob	3 005	0.2185
	Non-secreted	Non-effector	SP+Glob	9 845	0.7162
	Non-secreted	Effector	SP+TM	3	0.0002
	Non-secreted	Non-effector	SP+TM	12	0.0009
Ph. infestans	Secreted	Effector	SP+Glob	536	0.0337
	Secreted	Non-effector	SP+Glob	1 155	0.0726
	Secreted	Effector	SP+TM	0	0
	Secreted	Non-effector	SP+TM	10	0.0006
	Non-secreted	Effector	SP+Glob	4 235	0.2663
	Non-secreted	Non-effector	SP+Glob	9 945	0.6256
	Non-secreted	Effector	SP+TM	11	0.0007
	Non-secreted	Non-effector	SP+TM	9	0.0006
Ph. sojae	Secreted	Effector	SP+Glob	417	0.0172
	Secreted	Non-effector	SP+Glob	1 725	0.0711
	Secreted	Effector	SP+TM	0	0
	Secreted	Non-effector	SP+TM	8	0.0003
	Non-secreted	Effector	SP+Glob	7 857	0.3237
	Non-secreted	Non-effector	SP+Glob	14 234	0.5862
	Non-secreted	Effector	SP+TM	17	0.0007
	Non-secreted	Non-effector	SP+TM	16	0.0007
Py. ultimum	Secreted	Effector	SP+Glob	40	0.003
	Secreted	Non-effector	SP+Glob	991	0.0732
	Secreted	Effector	SP+TM	0	0
	Secreted	Non-effector	SP+TM	5	0.0004
	Non-secreted	Effector	SP+Glob	3 391	0.2504
	Non-secreted	Non-effector	SP+Glob	9 091	0.6716
	Non-secreted	Effector	SP+TM	14	0.001
	Non-secreted	Non-effector	SP+TM	5	0.0004
Hy. arabidopsidis	Secreted	Effector	SP+Glob	95	0.0072
	Secreted	Non-effector	SP+Glob	604	0.0457
	Secreted	Effector	SP+TM	0	0
	Secreted	Non-effector	SP+TM	2	0.0002
	Non-secreted	Effector	SP+Glob	3 573	0.2703
	Non-secreted	Non-effector	SP+Glob	8 942	0.676
	Non-secreted	Effector	SP+TM	7	0.0005
	Non-secreted	Non-effector	SP+TM	2	0.0002
Integrated DeepTM, POOE and WideEffHunter results for putative effectors prediction in secreted and non-secreted genes.
Proteome	Category (SignalP 6.0)	DeepTM: SP+Glob	DeepTM: SP+TM	Effector POOE confirmed (WideEffHunter confirmed Cys-rich , Non Cys-rich)
Pl. halstedii	Secreted	889	11	Yes: 58 (1,15), No: 831 (37,235)
	Non-secreted	12850	15	Yes: 3,005 (147,812), No: 9,845 (651,2292)
Ph. infestans	Secreted	1691	10	Yes: 536 (6,229), No: 1,155 (57,319)
	Non-secreted	14180	20	Yes: 4,235 (171,1258), No: 9,945 (331,2660)
Ph. sojae	Secreted	2142	8	Yes: 417 (11,147), No: 1,725 (82,395)
	Non-secreted	22091	33	Yes: 7,857 (482,2235), No: 14,234 (620,3750)
Py. ultimum	Secreted	1031	5	Yes: 40 (7,12), No: 991 (50,216)
	Non-secreted	12482	19	Yes: 3,391 (148,849), No: 9,091 (271,2380)
Hy. arabidopsidis	Secreted	699	2	Yes: 95 (3,40), No: 604 (29,203)
	Non-secreted	12515	9	Yes: 3,573 (232,902), No: 8,942 (724,2089)

## Sheet: upstream_regions_binning
Species	Secretion_status (from SignalP 6.0)	UpstreamBin	Count	Percentage
Hy. arabidopsidis	Non-Secreted	0-200	75	0.554611
Hy. arabidopsidis	Non-Secreted	201-400	32	0.236634
Hy. arabidopsidis	Non-Secreted	401-600	25	0.18487
Hy. arabidopsidis	Non-Secreted	601-800	27	0.19966
Hy. arabidopsidis	Non-Secreted	801-1000	13364	98.8242
Hy. arabidopsidis	Secreted	0-200	3	0.424328
Hy. arabidopsidis	Secreted	201-400	4	0.565771
Hy. arabidopsidis	Secreted	401-600	3	0.424328
Hy. arabidopsidis	Secreted	601-800	3	0.424328
Hy. arabidopsidis	Secreted	801-1000	694	98.1612
Ph. infestans	Non-Secreted	0-200	73	0.18133
Ph. infestans	Non-Secreted	201-400	31	0.0770033
Ph. infestans	Non-Secreted	401-600	18	0.0447116
Ph. infestans	Non-Secreted	601-800	13	0.0322917
Ph. infestans	Non-Secreted	801-1000	40123	99.6647
Ph. infestans	Secreted	0-200	1	0.0256542
Ph. infestans	Secreted	201-400	0	0
Ph. infestans	Secreted	401-600	4	0.102617
Ph. infestans	Secreted	601-800	0	0
Ph. infestans	Secreted	801-1000	3893	99.8717
Pl. halstedii	Non-Secreted	0-200	148	1.02401
Pl. halstedii	Non-Secreted	201-400	30	0.207569
Pl. halstedii	Non-Secreted	401-600	19	0.131461
Pl. halstedii	Non-Secreted	601-800	10	0.0691898
Pl. halstedii	Non-Secreted	801-1000	14246	98.5678
Pl. halstedii	Secreted	0-200	7	0.76087
Pl. halstedii	Secreted	201-400	3	0.326087
Pl. halstedii	Secreted	401-600	1	0.108696
Pl. halstedii	Secreted	601-800	1	0.108696
Pl. halstedii	Secreted	801-1000	908	98.6957
Py. ultimum	Non-Secreted	0-200	71	0.502833
Py. ultimum	Non-Secreted	201-400	22	0.155807
Py. ultimum	Non-Secreted	401-600	15	0.106232
Py. ultimum	Non-Secreted	601-800	13	0.092068
Py. ultimum	Non-Secreted	801-1000	13999	99.1431
Py. ultimum	Secreted	0-200	1	0.095057
Py. ultimum	Secreted	201-400	1	0.095057
Py. ultimum	Secreted	401-600	1	0.095057
Py. ultimum	Secreted	601-800	0	0
Py. ultimum	Secreted	801-1000	1049	99.7148

## Sheet: Ortholog_groups
Table 1: Effector prediction and functional annotation across conserved ortholog groups																	Table 2: Effector prediction and functional annotation across conserved ortholog groups using Blastp and PHI base
Cluster_Number	ProteinID	IsEffector_WideEffHunter_POOE_deepTM	Motifs/Hit/Domain (NCBI/EMBL ID)	Length	C_count	CysPercent	Cys_rich	EffectorCategory	PredictionScore	MeanScore	MedianScore	StdDev	ConfidenceScore	PredictedType	IsSecreted		Cluster_Number	ProteinID	IsEffector_WideEffHunter_POOE_deepTM	Blast Hit (NCBI/EMBL ID)	PercID	Evalue	EffectorCategory	PredictionScore	MeanScore	MedianScore	StdDev	ConfidenceScore	PredictedType	IsSecreted
14	CEG35346	yes	YFWxC					Motif-only	0.692	0.692	0.7028	0.0907	7.6266	SP+Glob	No		113	CEG37284	Unknown	SSPbP94 (PBRA_005298)	23.79	1.94e-14	PHI-only	0.8101	0.8101	0.8333	0.077	10.5227	SP+Glob	No
14	HpaP806065	yes	YFWxC					Motif-only	0.6161	0.6161	0.6273	0.0943	6.5363	SP+Glob	No		113	HpaP808542	Unknown	SSPbP94 (PBRA_005298)	24.48	5.08e-16	PHI-only	0.8389	0.8389	0.8785	0.0742	11.2998	SP+Glob	No
14	HpaP806066	yes	YFWxC					Motif-only	0.6888	0.6888	0.7003	0.0865	7.9597	SP+Glob	No		113	PHYSODRAFT_346270	Unknown	SSPbP94 (PBRA_005298)	22.53	4.05e-11	PHI-only	0.7941	0.7941	0.8404	0.0846	9.386	SP+Glob	No
14	PHYSODRAFT_353902	yes	YFWxC					Motif-only	0.7158	0.7158	0.7185	0.0799	8.9563	SP+Glob	No		113	PITG_17490	Unknown	SSPbP94 (PBRA_005298)	25.69	5.77e-11	PHI-only	0.7694	0.7694	0.8039	0.0896	8.5877	SP+Glob	No
14	PITG_10951	yes	YFWxC					Motif-only	0.7103	0.7103	0.7093	0.0938	7.5756	SP+Glob	No		113	PYU1_T005961	Unknown	SSPbP94 (PBRA_005298)	24.75	3.33e-14	PHI-only	0.8655	0.8655	0.8967	0.0595	14.5356	SP+Glob	No
20	CEG35425	Unknown	RXLR	529	10	1.89	no	Motif-only	0.3831	0.3831	0.3559	0.1298	2.9524	SP+Glob	No		130	CEG37517	yes	SSPbP94 (PBRA_005298)	25.41	7.27e-12	PHI-only	0.8971	0.8971	0.9084	0.0335	26.7951	SP+Glob	No
20	HpaP807508	Unknown	RXLR	527	10	1.9	no	Motif-only	0.36	0.36	0.3178	0.1203	2.9924	SP+Glob	No		130	PYU1_T007603	yes	SSPbP94 (PBRA_005298)	23.83	7.89e-12	PHI-only	0.8906	0.8906	0.8986	0.0385	23.1335	SP+Glob	No
20	PHYSODRAFT_354318	Unknown	RXLR	532	10	1.88	no	Motif-only	0.3765	0.3765	0.3534	0.1214	3.101	SP+Glob	No		130	HpaP803263	yes	SSPbP94 (PBRA_005298)	24.86	6.15e-12	PHI-only	0.9128	0.9128	0.9251	0.0299	30.5632	SP+Glob	No
20	PITG_17452	Unknown	RXLR	532	11	2.07	no	Motif-only	0.3295	0.3295	0.2996	0.1173	2.8095	SP+Glob	No		130	PHYSODRAFT_289206	yes	SSPbP94 (PBRA_005298)	25.41	3.16e-12	PHI-only	0.8965	0.8965	0.9061	0.0338	26.5022	SP+Glob	No
20	PYU1_T011941	Unknown	RXLR	532	9	1.69	no	Motif-only	0.4051	0.4051	0.3673	0.1177	3.4406	SP+Glob	No		130	PITG_04868	yes	SSPbP94 (PBRA_005298)	24.86	1.22e-11	PHI-only	0.8997	0.8997	0.9098	0.0314	28.6187	SP+Glob	No
36	CEG35716	yes	[LI]xAR	231	1	0.43	no	Unknown	0.5097	0.5097	0.4685	0.132	3.8621	SP+Glob	No		167	CEG38197	no	OASTL (XM_031217902 or FOIG_16458)	32.39	7.98e-55	PHI-only	0.3027	0.3027	0.3149	0.118	2.5649	SP+Glob	No
36	HpaP803739	yes	[LI]xAR	234	0	0	no	Unknown	0.522	0.522	0.4765	0.1383	3.7756	SP+Glob	No		167	HpaP803975	no	OASTL (XM_031217902 or FOIG_16458)	33.41	1.17e-54	PHI-only	0.2373	0.2373	0.2584	0.0944	2.5144	SP+Glob	No
36	PHYSODRAFT_351290	yes	[LI]xAR	231	0	0	no	Unknown	0.5807	0.5807	0.542	0.1265	4.5899	SP+Glob	No		167	PHYSODRAFT_299659	no	OASTL (XM_031217902 or FOIG_16458)	32.56	1.31e-57	PHI-only	0.2556	0.2556	0.2821	0.1075	2.3765	SP+Glob	No
36	PITG_15526	yes	[LI]xAR	231	0	0	no	Unknown	0.5687	0.5687	0.5334	0.1272	4.4692	SP+Glob	No		167	PITG_08445	no	OASTL (XM_031217902 or FOIG_16458)	31.69	2.63e-54	PHI-only	0.2334	0.2334	0.2552	0.0936	2.494	SP+Glob	No
36	PYU1_T012292	yes	[LI]xAR	224	0	0	no	Unknown	0.5549	0.5549	0.4869	0.1252	4.4336	SP+Glob	No		167	PYU1_T006888	no	OASTL (XM_031217902 or FOIG_16458)	34.12	1.76e-64	PHI-only	0.3361	0.3361	0.3923	0.1352	2.4857	SP+Glob	No
61	CEG36197	no	PDI	282	4	1.42	no	Unknown	0.3625	0.3625	0.3839	0.1346	2.692	SP+Glob	No		346	CEG42052	Unknown	SSPbP94 (PBRA_005298)	27.93	9.06e-15	PHI-only	0.7283	0.7283	0.81	0.11	6.6224	SP+Glob	No
61	HpaP802032	no	PDI	282	3	1.06	no	Unknown	0.411	0.411	0.433	0.146	2.8147	SP+Glob	No		346	HpaP806270	Unknown	SSPbP94 (PBRA_005298)	26.9	5.01e-14	PHI-only	0.7863	0.7863	0.8319	0.0729	10.7907	SP+Glob	No
61	PHYSODRAFT_353512	no	PDI	282	3	1.06	no	Unknown	0.368	0.368	0.3871	0.1419	2.5926	SP+Glob	No		346	PHYSODRAFT_352008	Unknown	SSPbP94 (PBRA_005298)	25.87	4.44e-13	PHI-only	0.7472	0.7472	0.8027	0.084	8.8952	SP+Glob	No
61	PITG_03463	no	PDI	297	4	1.35	no	Unknown	0.4017	0.4017	0.4431	0.1692	2.3741	SP+Glob	No		346	PITG_14935	Unknown	SSPbP94 (PBRA_005298)	26.59	5.9e-12	PHI-only	0.7256	0.7256	0.8046	0.1092	6.6471	SP+Glob	No
61	PYU1_T002219	no	PDI	282	3	1.06	no	Unknown	0.3873	0.3873	0.4165	0.1474	2.6277	SP+Glob	No		346	PYU1_T011877	Unknown	SSPbP94 (PBRA_005298)	28.37	1.01e-15	PHI-only	0.753	0.753	0.8239	0.0949	7.9388	SP+Glob	No
63	CEG36239	no	YFWxC,LysM	382	4	1.05	no	Unknown	0.3686	0.3686	0.4003	0.0551	6.6867	SP+Glob	No		412	CEG43562	no	OASTL (XM_031217902 or FOIG_16458)	30.54	4.97e-39	PHI-only	0.3014	0.3014	0.3317	0.0822	3.6653	SP+Glob	No
63	HpaP802101	no	YFWxC,LysM	390	4	1.03	no	Unknown	0.426	0.426	0.4473	0.0718	5.9297	SP+Glob	No		412	HpaP804871	no	OASTL (XM_031217902 or FOIG_16458)	31.03	2.97e-42	PHI-only	0.2001	0.2001	0.1948	0.0447	4.4743	SP+Glob	No
63	PHYSODRAFT_551993	no	YFWxC,LysM	390	5	1.28	no	Unknown	0.4022	0.4022	0.4269	0.0699	5.757	SP+Glob	No		412	PHYSODRAFT_559054	no	OASTL (XM_031217902 or FOIG_16458)	31.99	1.34e-42	PHI-only	0.2105	0.2105	0.1997	0.0535	3.9311	SP+Glob	No
63	PITG_03424	no	YFWxC,LysM	390	4	1.03	no	Unknown	0.3936	0.3936	0.4191	0.0692	5.6901	SP+Glob	No		412	PITG_13402	no	OASTL (XM_031217902 or FOIG_16458)	30.6	8.72e-42	PHI-only	0.2173	0.2173	0.216	0.0545	3.9903	SP+Glob	No
63	PYU1_T000771	no	YFWxC	389	4	1.03	no	Unknown	0.3843	0.3843	0.3963	0.0503	7.6403	SP+Glob	No		412	PYU1_T014640	no	OASTL (XM_031217902 or FOIG_16458)	31.04	4.56e-42	PHI-only	0.179	0.179	0.1888	0.0448	3.9927	SP+Glob	No
90	CEG36901	yes	Crinkler	437	5	1.14	no	Motif-only	0.7136	0.7136	0.7042	0.0595	11.9998	SP+Glob	No		462	CEG44792	Unknown	SSPbP94 (PBRA_005298)	30.66	7e-30	PHI-only	0.7932	0.7932	0.8331	0.0629	12.6117	SP+Glob	No
90	HpaP810609	yes	Crinkler	438	5	1.14	no	Motif-only	0.6804	0.6804	0.6743	0.0629	10.8213	SP+Glob	No		462	HpaP813355	Unknown	SSPbP94 (PBRA_005298)	31.58	8.49e-20	PHI-only	0.8551	0.8551	0.8794	0.0895	9.5568	SP+Glob	No
90	PHYSODRAFT_547793	yes	Crinkler	437	5	1.14	no	Motif-only	0.6647	0.6647	0.6739	0.0688	9.6643	SP+Glob	No		462	PHYSODRAFT_355004	Unknown	SSPbP94 (PBRA_005298)	30.66	1.32e-29	PHI-only	0.8209	0.8209	0.8557	0.0536	15.3172	SP+Glob	No
90	PITG_12535	yes	Crinkler	439	5	1.14	no	Motif-only	0.6712	0.6712	0.6763	0.0686	9.7887	SP+Glob	No		462	PITG_09538	Unknown	SSPbP94 (PBRA_005298)	30.29	2.27e-29	PHI-only	0.7999	0.7999	0.8408	0.0613	13.0487	SP+Glob	No
90	PYU1_T014761	yes	Crinkler	436	5	1.15	no	Motif-only	0.7069	0.7069	0.7061	0.0631	11.209	SP+Glob	No		462	PYU1_T013142	Unknown	SSPbP94 (PBRA_005298)	30.63	2.21e-32	PHI-only	0.8424	0.8424	0.8784	0.0523	16.116	SP+Glob	No
91	CEG36910	Unknown	ToxA	447	9	2.01	no	Motif-only	0.2298	0.2298	0.2426	0.0769	2.9889	SP+Glob	No
91	HpaP802202	Unknown	ToxA	447	8	1.79	no	Motif-only	0.2441	0.2441	0.2579	0.0785	3.1097	SP+Glob	No
91	PHYSODRAFT_557715	Unknown	ToxA	447	8	1.79	no	Motif-only	0.2415	0.2415	0.2545	0.0785	3.0768	SP+Glob	No
91	PITG_09875	Unknown	ToxA	447	9	2.01	no	Motif-only	0.2337	0.2337	0.2483	0.0743	3.1461	SP+Glob	No
91	PYU1_T002584	Unknown	ToxA	446	8	1.79	no	Motif-only	0.2478	0.2478	0.2656	0.0775	3.1984	SP+Glob	No
99	CEG37070	Unknown	EAR_1	480	4	0.83	no	Motif-only	0.3951	0.3951	0.4495	0.092	4.2921	SP+Glob	No
99	HpaP808159	Unknown	EAR_1	481	4	0.83	no	Motif-only	0.368	0.368	0.4228	0.0871	4.225	SP+Glob	No
99	PHYSODRAFT_325085	Unknown	EAR_1	480	4	0.83	no	Motif-only	0.3746	0.3746	0.4289	0.0869	4.3113	SP+Glob	No
99	PITG_17983	Unknown	EAR_1	480	4	0.83	no	Motif-only	0.3616	0.3616	0.4128	0.0825	4.3814	SP+Glob	No
99	PYU1_T005555	Unknown	EAR_1,[LI]xAR	480	4	0.83	no	Motif-only	0.3815	0.3815	0.4401	0.0985	3.872	SP+Glob	No
104	CEG37157	yes	LysM	423	2	0.47	no	Motif-only	0.7556	0.7556	0.7595	0.1063	7.1075	SP+Glob	No
104	HpaP813693	yes	LysM	428	3	0.7	no	Motif-only	0.6861	0.6861	0.676	0.1258	5.4561	SP+Glob	No
104	PHYSODRAFT_554783	yes	LysM	432	4	0.93	no	Motif-only	0.7486	0.7486	0.7412	0.0937	7.9875	SP+Glob	No
104	PITG_02112	yes	LysM	427	3	0.7	no	Motif-only	0.7659	0.7659	0.7539	0.1048	7.3081	SP+Glob	No
104	PYU1_T012895	yes	LysM	423	3	0.71	no	Motif-only	0.7065	0.7065	0.7117	0.1142	6.1859	SP+Glob	No
141	CEG37743	Unknown	LysM	247	3	1.21	no	Motif-only	0.2783	0.2783	0.3483	0.0906	3.0725	SP+Glob	No
141	HpaP814699	Unknown	LysM	251	2	0.8	no	Motif-only	0.202	0.202	0.2399	0.0614	3.2915	SP+Glob	No
141	PHYSODRAFT_286698	Unknown	LysM	247	3	1.21	no	Motif-only	0.2763	0.2763	0.3409	0.0874	3.1609	SP+Glob	No
141	PITG_09706	Unknown	LysM	247	3	1.21	no	Motif-only	0.257	0.257	0.3178	0.0837	3.0713	SP+Glob	No
141	PYU1_T011788	Unknown	LysM	246	2	0.81	no	Motif-only	0.3131	0.3131	0.3848	0.1045	2.9979	SP+Glob	No
142	CEG37744	Unknown		160	2	1.25	no	Unknown	0.8741	0.8741	0.9232	0.1028	8.4984	SP+Glob	No
142	PYU1_T011777	Unknown		157	2	1.27	no	Unknown	0.8649	0.8649	0.915	0.1086	7.9657	SP+Glob	No
142	HpaP806559	Unknown		160	2	1.25	no	Unknown	0.864	0.864	0.9162	0.1126	7.6759	SP+Glob	No
142	PHYSODRAFT_511066	Unknown		160	2	1.25	no	Unknown	0.8813	0.8813	0.928	0.0957	9.2056	SP+Glob	No
142	PITG_09707	Unknown		160	2	1.25	no	Unknown	0.881	0.881	0.9267	0.0954	9.2386	SP+Glob	No
172	CEG38253	yes	PDI	481	4	0.83	no	Motif-only	0.2959	0.2959	0.2692	0.155	1.9092	SP+Glob	No
172	HpaP803443	yes	PDI	482	3	0.62	no	Motif-only	0.3135	0.3135	0.2863	0.1548	2.0257	SP+Glob	No
172	PHYSODRAFT_510163	yes	PDI	503	4	0.8	no	Motif-only	0.3163	0.3163	0.2952	0.1574	2.0103	SP+Glob	No
172	PITG_16359	yes	PDI	481	4	0.83	no	Motif-only	0.3149	0.3149	0.2883	0.1547	2.0356	SP+Glob	No
172	PYU1_T012682	yes	PDI	481	3	0.62	no	Motif-only	0.3088	0.3088	0.2761	0.1543	2.002	SP+Glob	No
203	CEG38672	yes	PDI	171	2	1.17	no	Motif-only	0.8039	0.8039	0.8026	0.063	12.7561	SP+Glob	No
203	HpaP810566	yes	PDI	191	0	0	no	Motif-only	0.8419	0.8419	0.8574	0.0428	19.6683	SP+Glob	No
203	PHYSODRAFT_286746	yes	PDI	190	1	0.53	no	Motif-only	0.8274	0.8274	0.84	0.0434	19.0556	SP+Glob	No
203	PITG_14850	yes	PDI	190	1	0.53	no	Motif-only	0.8124	0.8124	0.8229	0.051	15.9244	SP+Glob	No
203	PYU1_T014276	yes	PDI	190	1	0.53	no	Motif-only	0.8304	0.8304	0.8164	0.0425	19.5205	SP+Glob	No
249	CEG39698	yes	LysM	425	6	1.41	no	Motif-only	0.6418	0.6418	0.6431	0.078	8.2323	SP+Glob	No
249	HpaP803216	yes	LysM	421	8	1.9	no	Motif-only	0.5461	0.5461	0.5402	0.0546	9.997	SP+Glob	No
249	PHYSODRAFT_309941	yes	LysM	457	12	2.63	no	Motif-only	0.6242	0.6242	0.6149	0.0697	8.9522	SP+Glob	No
249	PITG_02842	yes	LysM	425	6	1.41	no	Motif-only	0.6728	0.6728	0.6689	0.0666	10.1054	SP+Glob	No
249	PYU1_T008371	yes	LysM	426	6	1.41	no	Motif-only	0.6095	0.6095	0.6145	0.0668	9.1231	SP+Glob	No
279	CEG40302	yes	PDI	401	4	1	no	Motif-only	0.7279	0.7279	0.7255	0.1011	7.2004	SP+Glob	No
279	HpaP803144	yes	PDI	402	4	1	no	Motif-only	0.7548	0.7548	0.7333	0.0982	7.6841	SP+Glob	No
279	PHYSODRAFT_546373	yes	PDI	373	4	1.07	no	Motif-only	0.7257	0.7257	0.7212	0.0991	7.3213	SP+Glob	No
279	PITG_22454	yes	PDI	401	4	1	no	Motif-only	0.6301	0.6301	0.6506	0.1083	5.8172	SP+Glob	No
279	PYU1_T004326	yes	PDI	326	2	0.61	no	Motif-only	0.7815	0.7815	0.7789	0.0811	9.6419	SP+Glob	No
295	CEG40758	Yes	RXLR	111	8	7.21	yes	Motif-only	0.5129	0.5129	0.5843	0.1171	4.3787	SP+Glob	No
295	HpaP807549	Yes	RXLR	111	8	7.21	yes	Motif-only	0.558	0.558	0.6213	0.1162	4.8032	SP+Glob	No
295	PHYSODRAFT_285454	Yes	RXLR	113	8	7.08	yes	Motif-only	0.5413	0.5413	0.5891	0.1155	4.6888	SP+Glob	No
295	PITG_01524	Yes	RXLR	111	8	7.21	yes	Motif-only	0.545	0.545	0.5943	0.1137	4.7947	SP+Glob	No
295	PYU1_T012075	Yes	RXLR	117	8	6.84	yes	Motif-only	0.5128	0.5128	0.557	0.1164	4.4072	SP+Glob	No
304	CEG40921	Yes	RXLR,LysM	129	1	0.78	no	Motif-only	0.6923	0.6923	0.7051	0.0815	8.4912	SP+Glob	No
304	HpaP807598	yes	LysM	129	2	1.55	no	Motif-only	0.5862	0.5862	0.5957	0.0791	7.4097	SP+Glob	No
304	PHYSODRAFT_284634	yes	RXLR,LysM	129	1	0.78	no	Motif-only	0.5827	0.5827	0.5845	0.0887	6.5668	SP+Glob	No
304	PITG_02494	yes	RXLR,LysM	129	1	0.78	no	Motif-only	0.5663	0.5663	0.567	0.0911	6.2191	SP+Glob	No
304	PYU1_T004536	yes	RXLR,LysM	129	1	0.78	no	Motif-only	0.6044	0.6044	0.6272	0.0866	6.9783	SP+Glob	No
310	CEG41094	Unknown	PDI	89	0	0	no	Motif-only	0.6931	0.6931	0.6793	0.0778	8.9082	SP+Glob	No
310	HpaP811387	Unknown	PDI	90	0	0	no	Motif-only	0.7306	0.7306	0.7096	0.0747	9.7808	SP+Glob	No
310	PYU1_T005394	Unknown	PDI	70	0	0	no	Motif-only	0.686	0.686	0.686	0.0881	7.7846	SP+Glob	No
310	PHYSODRAFT_486753	Unknown	PDI	92	0	0	no	Motif-only	0.4381	0.4381	0.4172	0.0823	5.3209	SP+Glob	No
310	PITG_05666	Unknown	PDI	92	0	0	no	Motif-only	0.4749	0.4749	0.4315	0.101	4.7016	SP+Glob	No
322	CEG41425	yes	BRCT	469	8	1.71	no	Domain-only	0.1507	0.1507	0.1496	0.0479	3.1449	SP+Glob	No
322	HpaP808772	yes	BRCT	468	8	1.71	no	Domain-only	0.185	0.185	0.1838	0.0587	3.1505	SP+Glob	No
322	PHYSODRAFT_319561	yes	BRCT	466	8	1.72	no	Domain-only	0.1723	0.1723	0.1649	0.0507	3.3991	SP+Glob	No
322	PITG_14110	yes	BRCT	469	8	1.71	no	Domain-only	0.1692	0.1692	0.1673	0.0543	3.1139	SP+Glob	No
322	PYU1_T014708	yes	BRCT	469	8	1.71	no	Domain-only	0.205	0.205	0.2073	0.0603	3.4	SP+Glob	No
329	CEG41583	yes	LysM	298	0	0	no	Motif-only	0.6291	0.6291	0.7013	0.0958	6.5656	SP+Glob	No
329	HpaP810258	yes	LysM	299	0	0	no	Motif-only	0.554	0.554	0.5563	0.1227	4.5133	SP+Glob	No
329	PHYSODRAFT_354996	yes	LysM	312	1	0.32	no	Motif-only	0.6475	0.6475	0.7049	0.0894	7.2462	SP+Glob	No
329	PITG_09512	yes	LysM	298	0	0	no	Motif-only	0.6478	0.6478	0.72	0.0945	6.8524	SP+Glob	No
329	PYU1_T007973	yes	LysM	299	0	0	no	Motif-only	0.6912	0.6912	0.7484	0.0784	8.8197	SP+Glob	No
340	CEG41822	Unknown	YFWxC	198	5	2.53	no	Motif-only	0.3443	0.3443	0.3745	0.0805	4.2789	SP+Glob	No
340	HpaP802944	Unknown	YFWxC	198	4	2.02	no	Motif-only	0.293	0.293	0.2956	0.0773	3.7887	SP+Glob	No
340	PHYSODRAFT_284682	Unknown	YFWxC	198	5	2.53	no	Motif-only	0.3777	0.3777	0.3996	0.0953	3.9639	SP+Glob	No
340	PITG_15492	Unknown	YFWxC	198	5	2.53	no	Motif-only	0.3422	0.3422	0.3648	0.0883	3.8765	SP+Glob	No
340	PYU1_T007233	Unknown	YFWxC	198	5	2.53	no	Motif-only	0.2696	0.2696	0.2859	0.0733	3.6798	SP+Glob	No
360	CEG42354	Unknown	LysM	287	2	0.7	no	Motif-only	0.2105	0.2105	0.1986	0.0429	4.9121	SP+Glob	No
360	HpaP811357	Unknown	LysM	293	2	0.68	no	Motif-only	0.2106	0.2106	0.188	0.0452	4.6559	SP+Glob	No
360	PHYSODRAFT_481255	Unknown	LysM	281	2	0.71	no	Motif-only	0.204	0.204	0.186	0.0439	4.6421	SP+Glob	No
360	PITG_05630	Unknown	LysM	287	2	0.7	no	Motif-only	0.1904	0.1904	0.1747	0.0411	4.628	SP+Glob	No
360	PYU1_T005359	Unknown	LysM	287	2	0.7	no	Motif-only	0.186	0.186	0.1771	0.0402	4.6316	SP+Glob	No
394	CEG43106	yes	RXLR	688	12	1.74	no	Motif-only	0.6546	0.6546	0.721	0.1259	5.2007	SP+Glob	No
394	HpaP811352	yes	RXLR	690	10	1.45	no	Motif-only	0.7188	0.7188	0.7659	0.1196	6.0084	SP+Glob	No
394	PHYSODRAFT_556290	yes	RXLR	633	14	2.21	no	Motif-only	0.7628	0.7628	0.827	0.1199	6.3604	SP+Glob	No
394	PITG_05623	yes	RXLR	626	10	1.6	no	Motif-only	0.7599	0.7599	0.8219	0.1163	6.5327	SP+Glob	No
394	PYU1_T005357	yes	RXLR	627	10	1.59	no	Motif-only	0.6929	0.6929	0.7681	0.1344	5.1565	SP+Glob	No
414	CEG43673	Unknown	PDI	488	9	1.84	no	Motif-only	0.334	0.334	0.3518	0.0607	5.5067	SP+Glob	No
414	HpaP812287	Unknown	PDI	502	9	1.79	no	Motif-only	0.3126	0.3126	0.3331	0.0926	3.3743	SP+Glob	No
414	PHYSODRAFT_353780	Unknown	PDI	493	10	2.03	no	Motif-only	0.3454	0.3454	0.362	0.0687	5.0247	SP+Glob	No
414	PITG_02594	Unknown	PDI	493	9	1.83	no	Motif-only	0.3809	0.3809	0.377	0.0677	5.6239	SP+Glob	No
414	PYU1_T004494	Unknown	RXLR	360	8	2.22	no	Motif-only	0.3254	0.3254	0.3495	0.0703	4.6266	SP+Glob	No
429	CEG44130	yes	RXLR,LysM	249	2	0.8	no	Motif-only	0.5504	0.5504	0.5546	0.1031	5.3383	SP+Glob	No
429	HpaP803710	yes	RXLR,LysM	249	2	0.8	no	Motif-only	0.5581	0.5581	0.5652	0.1029	5.4245	SP+Glob	No
429	PHYSODRAFT_353822	yes	RXLR,LysM	249	2	0.8	no	Motif-only	0.5504	0.5504	0.5546	0.1031	5.3383	SP+Glob	No
429	PITG_19017	yes	RXLR,LysM	249	2	0.8	no	Motif-only	0.5504	0.5504	0.5546	0.1031	5.3383	SP+Glob	No
429	PYU1_T003542	yes	RXLR,LysM	249	2	0.8	no	Motif-only	0.5522	0.5522	0.5615	0.1067	5.176	SP+Glob	No
446	CEG44469	Unknown	YFWxC	652	2	0.31	no	Unknown	0.1054	0.1054	0.0921	0.0354	2.9815	SP+Glob	Yes
446	HpaP801004	Unknown	YFWxC	660	2	0.3	no	Unknown	0.1198	0.1198	0.0995	0.0477	2.5137	SP+Glob	Yes
446	PHYSODRAFT_286376	Unknown	YFWxC	660	1	0.15	no	Unknown	0.1192	0.1192	0.0983	0.0511	2.3316	SP+Glob	Yes
446	PITG_00527	Unknown	YFWxC	656	1	0.15	no	Unknown	0.1161	0.1161	0.0945	0.0491	2.3657	SP+Glob	Yes
446	PYU1_T004108	Unknown	YFWxC	656	2	0.3	no	Unknown	0.1225	0.1225	0.097	0.0582	2.1028	SP+Glob	Yes
454	CEG44697	Unknown	EAR_1	161	2	1.24	no	Motif-only	0.2224	0.2224	0.2245	0.0535	4.1603	SP+Glob	No
454	HpaP800486	Unknown	EAR_1	180	2	1.11	no	Motif-only	0.3197	0.3197	0.3325	0.0764	4.1864	SP+Glob	No
454	PHYSODRAFT_314739	Unknown	EAR_1	204	5	2.45	no	Motif-only	0.2236	0.2236	0.2308	0.0333	6.7199	SP+Glob	No
454	PITG_20206	Unknown	EAR_1	180	2	1.11	no	Motif-only	0.2236	0.2236	0.2308	0.0333	6.7199	SP+Glob	No
454	PYU1_T008671	Unknown	EAR_1	180	2	1.11	no	Motif-only	0.1911	0.1911	0.2008	0.0301	6.3501	SP+Glob	No
510	CEG45830	yes	EAR_1	263	6	2.28	no	Motif-only	0.5639	0.5639	0.6288	0.1533	3.6792	SP+Glob	No
510	HpaP806405	yes	EAR_1	289	6	2.08	no	Motif-only	0.6357	0.6357	0.6778	0.1513	4.201	SP+Glob	No
510	PHYSODRAFT_559218	yes	EAR_1	275	6	2.18	no	Motif-only	0.6267	0.6267	0.6321	0.1429	4.3846	SP+Glob	No
510	PITG_15281	yes	EAR_1	284	6	2.11	no	Motif-only	0.573	0.573	0.5734	0.1588	3.6074	SP+Glob	No
510	PYU1_T012909	yes	EAR_1	312	6	1.92	no	Motif-only	0.619	0.619	0.6473	0.1382	4.4791	SP+Glob	No
525	CEG46180	yes	YFWxC,CHxC	445	13	2.92	no	Motif-only	0.5328	0.5328	0.514	0.1497	3.5586	SP+Glob	No
525	HpaP807827	yes	YFWxC,CHxC	440	13	2.95	no	Motif-only	0.5249	0.5249	0.5	0.1469	3.5738	SP+Glob	No
525	PITG_12327	yes	YFWxC,CHxC	446	13	2.91	no	Motif-only	0.5454	0.5454	0.5267	0.1423	3.8312	SP+Glob	No
529	CEG46280	Unknown	RXLR,YFWxC	105	8	7.62	yes	Unknown	0.2645	0.2645	0.2694	0.0803	3.2943	SP+Glob	No
529	HpaP801854	Unknown	YFWxC	105	9	8.57	yes	Unknown	0.2595	0.2595	0.2707	0.08	3.2435	SP+Glob	No
529	PHYSODRAFT_491179	Unknown	YFWxC	105	8	7.62	yes	Unknown	0.2732	0.2732	0.2755	0.0797	3.4285	SP+Glob	No
529	PITG_16526	Unknown	YFWxC	105	8	7.62	yes	Unknown	0.2866	0.2866	0.2908	0.0828	3.4633	SP+Glob	No
529	PYU1_T002895	Unknown	YFWxC	106	8	7.55	yes	Unknown	0.2641	0.2641	0.2611	0.0758	3.4831	SP+Glob	No
548	CEG46742	yes	[LI]xAR	536	9	1.68	no	Motif-only	0.6347	0.6347	0.6446	0.0934	6.7963	SP+Glob	No
548	HpaP804907	yes	[LI]xAR	536	10	1.87	no	Motif-only	0.6139	0.6139	0.6283	0.0927	6.6217	SP+Glob	No
548	PHYSODRAFT_566801	yes	[LI]xAR	536	9	1.68	no	Motif-only	0.6327	0.6327	0.6449	0.0867	7.2937	SP+Glob	No
548	PITG_06320	yes	[LI]xAR	536	9	1.68	no	Motif-only	0.6374	0.6374	0.6476	0.0834	7.6396	SP+Glob	No
548	PYU1_T012609	yes	[LI]xAR	536	9	1.68	no	Motif-only	0.6444	0.6444	0.6545	0.0911	7.0732	SP+Glob	No
566	CEG47213	yes	RXLR	614	4	0.65	no	Motif-only	0.4158	0.4158	0.4398	0.0984	4.224	SP+Glob	No
566	HpaP807516	yes	RXLR	601	3	0.5	no	Motif-only	0.4135	0.4135	0.4303	0.095	4.35	SP+Glob	No
566	PHYSODRAFT_558930	yes	RXLR	613	3	0.49	no	Motif-only	0.438	0.438	0.4562	0.0943	4.6448	SP+Glob	No
566	PITG_01498	yes	RXLR	614	4	0.65	no	Motif-only	0.4367	0.4367	0.465	0.0935	4.6723	SP+Glob	No
566	PYU1_T011982	yes	RXLR	598	4	0.67	no	Motif-only	0.4378	0.4378	0.4475	0.0877	4.9903	SP+Glob	No
592	CEG47766	yes	LysM	144	1	0.69	no	Motif-only	0.7221	0.7221	0.7399	0.0422	17.097	SP+Glob	No
592	HpaP807022	yes	LysM	143	0	0	no	Motif-only	0.7147	0.7147	0.7286	0.0344	20.8004	SP+Glob	No
592	PHYSODRAFT_286426	yes	LysM	133	1	0.75	no	Motif-only	0.7975	0.7975	0.8044	0.0345	23.0933	SP+Glob	No
592	PITG_00266	yes	LysM	144	0	0	no	Motif-only	0.778	0.778	0.7868	0.0343	22.6568	SP+Glob	No
592	PYU1_T003943	yes	LysM	144	0	0	no	Motif-only	0.794	0.794	0.7981	0.0281	28.2155	SP+Glob	No

## Sheet: legend_1
Table1 and 2 of Ortholog_groups: This table summarizes effector predictions across conserved ortholog groups identified in five plant pathogenic oomycetes (Plasmopara halstedii, Phytophthora sojae, P. infestans, Pythium ultimum, and Hyaloperonospora arabidopsidis). Each row represents a protein from one of the 38 ortholog clusters, annotated with effector motifs and evaluated using various comput…
(Phal ∩ Psoj ∩ Pinf ∩ Pult ∩ Harab): Indicates the ortholog group contains representatives from all five species.
C_count: Number of cysteine residues in the protein.
Cluster_Number: Identifier for orthologous gene cluster shared across species.
ConfidenceScore: Aggregated prediction confidence score from DeepTM.
Cys_rich: Whether the protein qualifies as cysteine-rich (defined threshold).
CysPercent: Proportion of cysteine residues in the full-length sequence.
EffectorCategory: Categorization based on presence of motifs (Regex) or homology with PHI-base using blastp: Motif-only, Domains-only, PHI-only or Unknown.
IsEffector_WideEffHunter_deepTM_POOE: Prediction result (Yes/No) from all tools POOE + DeepTM + WideEffHunter, classifying proteins as effectors based on multiple neural network features amd based on motif/domain matches with known effectors. Prediction result as 'unknown' when effector results vary. For example, WideEffhunter (yes) and POOE (no) would result in 'unknown' effector category.
IsSecreted: Whether SignalP classifies the protein as secreted (Yes/ No).
Length: Length of the protein in amino acids.
Motifs/Hit/Domain (NCBI/EMBL ID): Conserved effector motifs detected in the protein, e.g., RXLR, YFWxC, or [LI]xAR.
PercID / Evalue: (Not shown here; placeholders for potential BLAST-based homology metrics).
PredictedType: Combined SignalP and DeepTM prediction; e.g., SP+Glob (secreted with globular domain).
PredictionScore, MeanScore, MedianScore, StdDev: Outputs from the POOE + DeepTM pipeline, indicating effector classification confidence.
ProteinID: Unique identifier for each protein sequence in the dataset.

## Sheet: Known_motifs_upstream
Motif-to-Transcription Factor (TF) Mapping using meme suite's TOMTOM and JASPAR					Abbrevation for column 'Class':
					Homeo domain factors =HDF
					Basic helix-loop-helix factors = bHLH
					Basicleucine zipper factors = bZIP
					C2H2 zinc finger= C2H2-ZF
					Tryptophan cluster factors = Tryptophan CF
					Heteromeric CCAAT-binding factors = CCAAT-binding
					Copper-fist DNA-binding domain = Copper-fist binding
					C4 zinc finger = C4-ZF
Cluster_ID	Description	Short_name	TOMTOM_Target_ID	Motif_Sequence(s)	TOMTOM_URL	TOMTOM_Name	Class	Family	Species	Taxon	UniProt_ID	Protein_Name	Uniprot_Function	Organism	KEGG_Pathways
14	Succinate Dehydrogenase/Fumarate Reductase Iron-Sulfur)	Succinate DH	MA0247.2	TTCAAGTGBCGCARAA	http://jaspar2022.genereg.net/matrix/MA0247.2	tin	HDF	Homeo	Drosophila melanogaster	insects	P22711	Muscle-specific homeobox protein tinman	Required for the development of heart and visceral muscle; for the formation of somatic muscles. Has a crucial function in the early mesodermal subdivisions	Drosophila melanogaster	dme:Dmel_CG7895
20	Importin Alpha	Importin Alpha	MA1828.1	GTGTGGDCCACA	http://jaspar2022.genereg.net/matrix/MA1828.1	Zm00001d038683	bHLH	TCP	Zea mays	plants	C0HEC8	.	.	Zea mays	.
36	ATPase, OSCP/delta subunit	OSCP ATPase	MA0064.1	CGTCAAAGCG	http://jaspar2022.genereg.net/matrix/MA0064.1	PBF	C4-ZF	DOF	Zea mays	plants	O24463	Dof zinc finger protein PBF	Transcription factor that binds specifically to a 5'-AA[AG]G-3' consensus core sequence. May enhance the DNA binding of the bZIP transcription factor Opaque-2 to O2 binding site elements	Zea mays	.
36	ATPase, OSCP/delta subunit	OSCP ATPase	MA1891.1	CACRCSCSAYC	http://jaspar2022.genereg.net/matrix/MA1891.1	Klf3/8/12	C2H2-ZF	Three-zinc finger Kruppel-related	Ciona intestinalis	urochordates		.	.	.	.
61	3-Oxoacyl-(Acyl-Carrier-Protein) Reductase	ACP	MA0119.1	AATKGMAAWDTKCCAA	http://jaspar2022.genereg.net/matrix/MA0119.1	NFIC::TLX1	SMAD/NF-1 DNA-binding , HDF	Nuclear factor 1, NK	Homo sapiens	vertebrates	P08651	Nuclear factor 1 C-type	Recognizes and binds the palindromic sequence 5'-TTGGCNNNNNGCCAA-3' present in viral and cellular promoters and in the origin of replication of adenovirus type 2. These proteins are individually capable of activating transcription and replication	Homo sapiens	hsa:4782
63	OBG GTPase Family	OBG	MA0227.1	GACTGACAGCACCAMGT	http://jaspar2022.genereg.net/matrix/MA0227.1	hth	HDF	TALE-type homeo domain factors	Drosophila melanogaster	insects	O46339	Homeobox protein homothorax	All isoforms are required for patterning of the embryonic cuticle. Acts with exd to delimit the eye field and prevent inappropriate eye development. Isoforms that carry the homeodomain are required for proper localization of chordotonal organs within the peripheral nervous system and antennal identity; required to activate antennal-specific genes, such as sal and to repress the leg-like expressio…	Drosophila melanogaster	dme:Dmel_CG17117
63	OBG GTPase Family	OBG	MA1529.1	AWGTCGTGCAGCTGYYT	http://jaspar2022.genereg.net/matrix/MA1529.1	NHLH2	bHLH	Tal-related	Homo sapiens	vertebrates	Q02577	Helix-loop-helix protein 2	Transcription factor which binds the E box motif 5'-CA[TC][AG]TG-3'. Involved in regulating energy expenditure, body mass, voluntary physical activity, mating behavior and reproductive longevity, acting through the hypothalamic-pituitary-gonadal axis. Acts as a transcriptional activator of target genes, including NDN, PCSK1, MC4R (By similarity). Is also a transcriptional activator of KISS1 (PubM…	Homo sapiens	hsa:4808
89	3-Oxoacyl-(Acyl-Carrier-Protein) Reductase	ACP	MA0640.2	ACGTTCACYTCCTCRTG	http://jaspar2022.genereg.net/matrix/MA0640.2	ELF3	Tryptophan CF	Ets-related	Homo sapiens	vertebrates	P78545	ETS-related transcription factor Elf-3	Transcriptional activator that binds and transactivates ETS sequences containing the consensus nucleotide core sequence GGA[AT]. Acts synergistically with POU2F3 to transactivate the SPRR2A promoter and with RUNX1 to transactivate the ANGPT1 promoter. Also transactivates collagenase, CCL20, CLND7, FLG, KRT8, NOS2, PTGS2, SPRR2B, TGFBR2 and TGM3 promoters. Represses KRT4 promoter activity. Involve…	Homo sapiens	hsa:1999
90	Peptide chain release factor eRF1/aRF1	ACP	MA0119.1	TGGCAGCATG	http://jaspar2022.genereg.net/matrix/MA0119.1	NFIC::TLX1	['SMAD/NF-1 DNA-binding ', 'HDF']	['Nuclear factor 1', 'NK']	Homo sapiens	vertebrates	P08651	Nuclear factor 1 C-type	Recognizes and binds the palindromic sequence 5'-TTGGCNNNNNGCCAA-3' present in viral and cellular promoters and in the origin of replication of adenovirus type 2. These proteins are individually capable of activating transcription and replication	Homo sapiens	hsa:4782
91	Adaptor complexes medium subunit	Adaptor Subunit	MA0636.1	TTGACGTGGCA	http://jaspar2022.genereg.net/matrix/MA0636.1	BHLHE41	bHLH	Hairy-related factors	Homo sapiens	vertebrates	Q9C0J9	Class E basic helix-loop-helix protein 41	Transcriptional repressor involved in the regulation of the circadian rhythm by negatively regulating the activity of the clock genes and clock-controlled genes (PubMed:11278948, PubMed:14672706, PubMed:15193144, PubMed:15560782, PubMed:18411297, PubMed:19786558, PubMed:25083013). Acts as the negative limb of a novel autoregulatory feedback loop (DEC loop) which differs from the one formed by the…	Homo sapiens	hsa:79365
104	Enoyl-CoA hydratase/isomerase, HIBYL-CoA-H type	Enoyl-CoA Hydratase	MA0545.1	AGACWBAGCAGCTGHAG	http://jaspar2022.genereg.net/matrix/MA0545.1	hlh-1	bHLH		Caenorhabditis elegans	nematodes	P22980	Myoblast determination protein 1 homolog	Involved in myogenesis, in cooperation with transcription factors unc-120 and hnd-1 (PubMed:15892873, PubMed:17142668, PubMed:2175254). Acts redundantly with fozi-1 to promote body wall muscle cell and coelomocyte specification in postembryonic mesoderm progenitors, probably through suppression of sem-2 (PubMed:21307099)	Caenorhabditis elegans	cel:CELE_B0304.1
113	Solute Carrier Family 25	Solute Carrier	MA0638.1	GGCAGCCACGTYTCCAT	http://jaspar2022.genereg.net/matrix/MA0638.1	CREB3	bZIP	CREB-related factors	Homo sapiens	vertebrates	O43889	Cyclic AMP-responsive element-binding protein 3	Endoplasmic reticulum (ER)-bound sequence-specific transcription factor that directly binds DNA and activates transcription (PubMed:10984507, PubMed:15845366, PubMed:16940180, PubMed:19779205, PubMed:9271389). Plays a role in the unfolded protein response (UPR), promoting cell survival versus ER stress-induced apoptotic cell death (PubMed:15845366, PubMed:16940180). Also involved in cell prolifer…	Homo sapiens	hsa:10488
113	Solute Carrier Family 25	Solute Carrier	MA0006.1	TCYGCGTGGATGWACAG	http://jaspar2022.genereg.net/matrix/MA0006.1	Ahr::Arnt	bHLH	PAS domain factors, PAS domain factors	Mus musculus	vertebrates	P30561	Aryl hydrocarbon receptor	Ligand-activated transcription factor that enables cells to adapt to changing conditions by sensing compounds from the environment, diet, microbiome and cellular metabolism, and which plays important roles in development, immunity and cancer (PubMed:10639156, PubMed:10973493, PubMed:1314586, PubMed:33436590, PubMed:7961644, PubMed:7969080, PubMed:8806883, PubMed:9427285). Upon ligand binding, tra…	Mus musculus	mmu:11622
141	Proteasome B-type subunit	Proteasome B	MA0208.1	TTCCTATAATTAAGGAG	http://jaspar2022.genereg.net/matrix/MA0208.1	al	HDF	Paired-related HD factors	Drosophila melanogaster	insects	Q06453	Homeobox protein aristaless	Involved in the morphogenesis of proximal and distal pattern elements in a subset of appendages. Also has a role in early imaginal disk development	Drosophila melanogaster	dme:Dmel_CG3935
141	Proteasome B-type subunit	Proteasome B	MA1084.1	TCGTTGACCATGMTDCT	http://jaspar2022.genereg.net/matrix/MA1084.1	WRKY38	GCM domain factors	WRKY	Arabidopsis thaliana	plants	Q8GWF1	Probable WRKY transcription factor 38	Transcription factor. Interacts specifically with the W box (5'-(T)TGAC[CT]-3'), a frequently occurring elicitor-responsive cis-acting element (By similarity)	Arabidopsis thaliana	ath:AT5G22570
167	Cys/Met metabolism, PPD enzyme	Cys/Met Enzyme	MA0287.1	CAGCAGAAACGAGG	http://jaspar2022.genereg.net/matrix/MA0287.1	CUP2	Copper-fist binding		Saccharomyces cerevisiae	fungi	P15315	Transcriptional activator protein CUP2	Trans-acting regulatory protein that activates transcription of the CUP1 gene (metallothionein) in response to copper ions. Binds to the CUP1 UAS sequence 5'-GCTTCTTTTCCGCTGA-3'. Binds DNA only in presence of copper or silver. Copper seems to alter the conformation of the protein	Saccharomyces cerevisiae (strain ATCC 204508 / S288c)	sce:YGL166W
167	Cys/Met metabolism, PPD enzyme	Cys/Met Enzyme	MA0060.1	CCAATSRGATCTTKR	http://jaspar2022.genereg.net/matrix/MA0060.1	NFYA	Other alpha	NFY	Xenopus laevis,Xenopus tropicalis,Gallus gallus,Homo sapiens,Bos taurus,Oryctolagus cuniculus,Mus musculus,Rattus norvegicus	vertebrates	P23511	Nuclear transcription factor Y subunit alpha	Component of the sequence-specific heterotrimeric transcription factor (NF-Y) which specifically recognizes a 5'-CCAAT-3' box motif found in the promoters of its target genes. NF-Y can function as both an activator and a repressor, depending on its interacting cofactors. NF-YA positively regulates the transcription of the core clock component BMAL1	Homo sapiens	hsa:4800
172	UTP-glucose-1-phosphate uridylyltransferase	UTP-G1P Uridylyltransferase	MA0821.1	CGCACGYGYCTGGAGCT	http://jaspar2022.genereg.net/matrix/MA0821.1	HES5	bHLH	Hairy-related factors	Homo sapiens	vertebrates	Q5TA89	Transcription factor HES-5	Transcriptional repressor of genes that require a bHLH protein for their transcription. Plays an important role as neurogenesis negative regulator (By similarity)	Homo sapiens	hsa:388585
203	Small ribosomal subunit protein eS7	Ribosome eS7	MA0326.1	CGTTTTGCTCAVHGA	http://jaspar2022.genereg.net/matrix/MA0326.1	MAC1	Copper-fist binding		Saccharomyces cerevisiae	fungi	P35192	Metal-binding activator 1	Regulatory protein involved in Cu/Fe utilization and stress resistance. Involved in basal level transcription of FRE1 and H(2)O(2)-induced transcription of CTT1. Regulates the transcription of CTR1 and CTR3 via the copper ion responsive elements in their promoters. Required for degradation of CTR1	Saccharomyces cerevisiae (strain ATCC 204508 / S288c)	sce:YMR021C
249	Choline/ethanolamine phosphotransferase	CE Phosphotransferase	MA1238.1	CGDCGGTGATGRCGVWG	http://jaspar2022.genereg.net/matrix/MA1238.1	ERF038	AP2/EREBP	ERF/DREB	Arabidopsis thaliana	plants	Q9ZQP3	Ethylene-responsive transcription factor ERF038	Probably acts as a transcriptional activator. Binds to the GCC-box pathogenesis-related promoter element. May be involved in the regulation of gene expression by stress factors and by components of stress signal transduction pathways (By similarity)	Arabidopsis thaliana	ath:AT2G35700
249	Choline/ethanolamine phosphotransferase	CE Phosphotransferase	MA0567.1	CGCCTCCARMTGCAAGT	http://jaspar2022.genereg.net/matrix/MA0567.1	ERF1B	AP2/EREBP	ERF/DREB	Arabidopsis thaliana	plants	Q8LDC8	Ethylene-responsive transcription factor 1B	Acts as a transcriptional activator. Binds to the GCC-box pathogenesis-related promoter element. Involved in the regulation of gene expression during the plant development, and/or mediated by stress factors and by components of stress signal transduction pathways. Seems to be a key integrator of ethylene and jasmonate signals in the regulation of ethylene/jasmonate-dependent defenses. Can mediate…	Arabidopsis thaliana	ath:AT3G23240
249	Choline/ethanolamine phosphotransferase	CE Phosphotransferase	MA1185.1	GABATTTTTYT	http://jaspar2022.genereg.net/matrix/MA1185.1	LHY	Tryptophan CF	Myb-related	Arabidopsis thaliana	plants	F4HQG9	.	.	Arabidopsis thaliana	.
295	RING-box E3 Ubiquitin Ligase	RING E3 Ligase	MA1814.1	TATTTT	http://jaspar2022.genereg.net/matrix/MA1814.1	RIN	MADS box factors	MIKC	Solanum lycopersicum	plants	Q8S4L4	.	.	Solanum lycopersicum	sly:543708
304	Large ribosomal subunit protein mL43	Ribosome mL43	MA0359.1	AACCCATACACRTCRTT	http://jaspar2022.genereg.net/matrix/MA0359.1	RAP1	Tryptophan CF	Myb/SANT domain factors	Saccharomyces cerevisiae	fungi	P11938	DNA-binding protein RAP1	Essential regulatory protein in yeast whose DNA-binding sites are found at three types of chromosomal elements: promoters, silencers, and telomeres (PubMed:3315231, PubMed:8194531). RAP1 is also involved in the regulation of telomere structure, where its binding sites are found within the terminal poly[C(1-3)A] sequences (PubMed:3315231, PubMed:8194531). The opposite regulatory functions of RAP1 …	Saccharomyces cerevisiae (strain ATCC 204508 / S288c)	sce:YNL216W
310	Small nuclear ribonucleoprotein E	snRNP-E	MA0502.1	TTTYRGCCAATMAAA	http://jaspar2022.genereg.net/matrix/MA0502.1	NFYB	CCAAT-binding	Heteromeric CCAAT-binding	Homo sapiens	vertebrates	P25208	Nuclear transcription factor Y subunit beta	Component of the sequence-specific heterotrimeric transcription factor (NF-Y) which specifically recognizes a 5'-CCAAT-3' box motif found in the promoters of its target genes. NF-Y can function as both an activator and a repressor, depending on its interacting cofactors	Homo sapiens	hsa:4801
322	Endoplasmic reticulum vesicle transporter	ER Transporter	MA0666.2	TTAATKAKDTTCWAVAG	http://jaspar2022.genereg.net/matrix/MA0666.2	MSX1	HDF	NK	Homo sapiens	vertebrates	P28360	Homeobox protein MSX-1	Acts as a transcriptional repressor (By similarity). Capable of transcription autoinactivation (By similarity). Binds to the consensus sequence 5'-C/GTAAT-3' in downstream activin regulatory elements (DARE) in the gene promoter, thereby repressing the transcription of CGA/alpha-GSU and GNRHR (By similarity). Represses transcription of myoblast differentiation factors (By similarity). Binds to cor…	Homo sapiens	hsa:4487
322	Endoplasmic reticulum vesicle transporter	ER Transporter	MA1575.1	ACCRCAHTSRGGACA	http://jaspar2022.genereg.net/matrix/MA1575.1	THRB	C4-ZF	Thyroid hormone receptor-related factors (NR1)	Homo sapiens	vertebrates	P10828	Thyroid hormone receptor beta	Nuclear hormone receptor that can act as a repressor or activator of transcription. High affinity receptor for thyroid hormones, including triiodothyronine and thyroxine	Homo sapiens	hsa:7068
329	Prohibitin	Prohibitin	MA0663.1	ACGTGACAGCAAAGTCA	http://jaspar2022.genereg.net/matrix/MA0663.1	MLX	bHLH	bHLH-ZIP	Homo sapiens	vertebrates	Q9UH92	Max-like protein X	Transcription regulator. Forms a sequence-specific DNA-binding protein complex with MAD1, MAD4, MNT, WBSCR14 and MLXIP which recognizes the core sequence 5'-CACGTG-3'. The TCFL4-MAD1, TCFL4-MAD4, TCFL4-WBSCR14 complexes are transcriptional repressors. Plays a role in transcriptional activation of glycolytic target genes. Involved in glucose-responsive gene regulation	Homo sapiens	hsa:6945
332			MA0402.1	CTGCTGGTTG	http://jaspar2022.genereg.net/matrix/MA0402.1	SWI5	A.T hook factors		Saccharomyces cerevisiae	fungi	P08153	Transcriptional factor SWI5	Determines the mother-cell-specific transcription of the HO endonuclease gene that is responsible for the initiation of mating-type switching in yeast. Recognizes a specific sequence in the promoter of the HO gene. Activates EGT2 transcription in a concentration-dependent manner. Synthesized during G2 and early mitosis	Saccharomyces cerevisiae (strain ATCC 204508 / S288c)	sce:YDR146C
340	Thiol-specific antioxidant peroxiredoxin	Peroxiredoxin	MA1719.1	AAYDGGNGAGATGCRGG	http://jaspar2022.genereg.net/matrix/MA1719.1	ZNF816	C2H2 zinc finger	More than 3 adjacent zinc fingers	Homo sapiens	vertebrates	Q0VGE8	Zinc finger protein 816	May be involved in transcriptional regulation	Homo sapiens	hsa:125893
346	Tricarboxylate transport protein-like	TCA Transporter	MA0605.1	YGGYGACGHSRSYGACG	http://jaspar2022.genereg.net/matrix/MA0605.1	Atf3	bZIP	Fos-related	Mus musculus	vertebrates	Q60765	Cyclic AMP-dependent transcription factor ATF-3	This protein binds the cAMP response element (CRE) (consensus: 5'-GTGACGT[AC][AG]-3'), a sequence present in many viral and cellular promoters (PubMed:11916968). Represses transcription from promoters with ATF sites (PubMed:11916968). It may repress transcription by stabilizing the binding of inhibitory cofactors at the promoter (By similarity)	Mus musculus	mmu:11910
360	U3 snoRNP protein/Ribosome production factor 1	U3 snoRNP	MA1370.1	AGYTTTGTCTDTT	http://jaspar2022.genereg.net/matrix/MA1370.1	IDD5	C2H2-ZF		Arabidopsis thaliana	plants	Q9ZUL3	Protein indeterminate-domain 5, chloroplastic	Transcription factor acting as a positive regulator of the starch synthase SS4. Controls chloroplast development and starch granule formation (PubMed:22898356). Binds DNA via its zinc fingers (PubMed:24821766). Recognizes and binds to SCL3 promoter sequence 5'-AGACAA-3' to promote its expression when in complex with RGA (PubMed:24821766)	Arabidopsis thaliana	ath:AT2G02070
394	Activating Molecule in BECN1-Regulated Autophagy	BECN1 Activator	MA1522.1	CYCCCCTCG	http://jaspar2022.genereg.net/matrix/MA1522.1	MAZ	C2H2-ZF	More than 3 adjacent zinc fingers	Homo sapiens	vertebrates	P56270	Myc-associated zinc finger protein	Transcriptional regulator, potentially with dual roles in transcription initiation and termination	Homo sapiens	hsa:4150
394	Activating Molecule in BECN1-Regulated Autophagy	BECN1 Activator	MA1572.1	TGRCAGYAGYCAATYTT	http://jaspar2022.genereg.net/matrix/MA1572.1	TGIF2LY	HDF	TALE-type homeo domain factors	Homo sapiens	vertebrates	Q8IUE0	Homeobox protein TGIF2LY	May have a transcription role in testis. May act as a competitor/regulator of TGIF2LX	Homo sapiens	hsa:90655
394	Activating Molecule in BECN1-Regulated Autophagy	BECN1 Activator	MA1653.1	TCCCCCCTCC	http://jaspar2022.genereg.net/matrix/MA1653.1	ZNF148	C2H2-ZF	More than 3 adjacent zinc fingers	Homo sapiens	vertebrates	Q9UQR1	Zinc finger protein 148	Involved in transcriptional regulation. Represses the transcription of a number of genes including gastrin, stromelysin and enolase. Binds to the G-rich box in the enhancer region of these genes	Homo sapiens	hsa:7707
412	Cys/Met metabolism, PPD enzyme	Cys/Met Enzyme	MA0332.1	GTGCTGTGGGGTTGCAR	http://jaspar2022.genereg.net/matrix/MA0332.1	MET28	bZIP		Saccharomyces cerevisiae	fungi	P40573	Transcriptional activator of sulfur metabolism MET28	Acts as an accessory factor in the activation of sulfur amino acids metabolism genes. Possesses no intrinsic transcription activation abilities. Binds to the MET16 promoter as a complex with MET4 and CBF1. Enhances the DNA-binding activity of CBF1	Saccharomyces cerevisiae (strain ATCC 204508 / S288c)	sce:YIR017C
414	Glutamate decarboxylase	Glutamate Decarboxylase	MA1730.1	AGCCBGCGGTGCCTGC	http://jaspar2022.genereg.net/matrix/MA1730.1	ZNF708	C2H2-ZF	More than 3 adjacent zinc fingers	Homo sapiens	vertebrates	P17019	Zinc finger protein 708	May be involved in transcriptional regulation	Homo sapiens	hsa:7562
429	14-3-3 protein	14-3-3 protein	MA1467.1	TGCAGCTG	http://jaspar2022.genereg.net/matrix/MA1467.1	ATOH1	bHLH	Tal-related	Homo sapiens	vertebrates	Q92858	Transcription factor ATOH1	Transcriptional regulator. Activates E box-dependent transcription in collaboration with TCF3/E47, but the activity is completely antagonized by the negative regulator of neurogenesis HES1. Plays a role in the differentiation of subsets of neural cells by activating E box-dependent transcription (By similarity)	Homo sapiens	hsa:474
429	14-3-3 protein	14-3-3 protein	MA0332.1	CAGCCTGTGGC	http://jaspar2022.genereg.net/matrix/MA0332.1	MET28	bZIP		Saccharomyces cerevisiae	fungi	P40573	Transcriptional activator of sulfur metabolism MET28	Acts as an accessory factor in the activation of sulfur amino acids metabolism genes. Possesses no intrinsic transcription activation abilities. Binds to the MET16 promoter as a complex with MET4 and CBF1. Enhances the DNA-binding activity of CBF1	Saccharomyces cerevisiae (strain ATCC 204508 / S288c)	sce:YIR017C
446	Heat shock protein 70 family	HSP70	MA1100.1	GCAGCAGGC	http://jaspar2022.genereg.net/matrix/MA1100.1	ASCL1	bHLH	MyoD/ASC-related factors	Homo sapiens	vertebrates	P50553	Achaete-scute homolog 1	Transcription factor that plays a key role in neuronal differentiation: acts as a pioneer transcription factor, accessing closed chromatin to allow other factors to bind and activate neural pathways. Directly binds the E box motif (5'-CANNTG-3') on promoters and promotes transcription of neuronal genes. The combination of three transcription factors, ASCL1, POU3F2/BRN2 and MYT1L, is sufficient to…	Homo sapiens	hsa:429
446	Heat shock protein 70 family	HSP70	MA1887.1	TTTCTAGAAGMCMCGT	http://jaspar2022.genereg.net/matrix/MA1887.1	Hsf1-2-4	Heat shock factors	HSF factors	Ciona intestinalis	urochordates		.	.	.	.
446	Heat shock protein 70 family	HSP70	MA0409.1	GCCACGTMAGCA	http://jaspar2022.genereg.net/matrix/MA0409.1	TYE7	bHLH		Saccharomyces cerevisiae	fungi	P33122	Transcription factor TYE7	Transcriptional activator of glycolytic gene expression, such as enolase genes (ENO1 and ENO2), glyceraldehyde-3-phosphate dehydrogenase gene (TDH), phosphoglycerate kinase (PGK1), phosphoglycerate mutase (PGM1), pyruvate kinase (PYK1) and triosephosphate isomerase (TPI1) genes (PubMed:10606743, PubMed:7739544). Binds DNA on E-box motifs: 5'-CANNTG-3' (PubMed:10606743). In response to adenylic nu…	Saccharomyces cerevisiae (strain ATCC 204508 / S288c)	sce:YOR344C
454	Small GTPase superfamily, ARF type	ARF GTPase	MA0247.1	TGCTCAAGTGTCTDATC	http://jaspar2022.genereg.net/matrix/MA0247.1	tin	HDF	Homeo	Drosophila melanogaster	insects	P22711	Muscle-specific homeobox protein tinman	Required for the development of heart and visceral muscle; for the formation of somatic muscles. Has a crucial function in the early mesodermal subdivisions	Drosophila melanogaster	dme:Dmel_CG7895
462	Mitochondrial Carrier	Mito Carrier	MA1815.1	CMRATGCAGCASSNAC	http://jaspar2022.genereg.net/matrix/MA1815.1	GRF4	CH3	GRF	Oryza sativa	plants	Q6ZIK5	Growth-regulating factor 4	Transcription activator that plays a role in the regulation of meristematic function in leaves, stems and inflorescences (PubMed:24532604). Transcription activator that plays a regulatory role in grain development (PubMed:26187814, PubMed:26936408, PubMed:27107174, PubMed:27250747, PubMed:27250749). Positively regulates grain size by promoting cell division and expansion, leading to increased gra…	Oryza sativa subsp. japonica	.
510	CCR4-NOT transcription complex subunit 9	CCR4-NOT Subunit	MA1710.1	GAGGCAAG	http://jaspar2022.genereg.net/matrix/MA1710.1	ZNF257	C2H2-ZF	More than 3 adjacent zinc fingers	Homo sapiens	vertebrates	Q9Y2Q1	Zinc finger protein 257	May be involved in transcriptional regulation	Homo sapiens	hsa:113835
525	SLR1143 Protein	SLR1143	MA1033.1	CGTGTACACRCGTG	http://jaspar2022.genereg.net/matrix/MA1033.1	OJ1058_F05.8	bZIP	Group A	Oryza sativa Japonica Group	plants	Q75HX9	.	.	Oryza sativa subsp. japonica	.
529	DNA-directed RNA polymerase subunit/transcription factor S	RNA Polymerase	MA0314.2	GATTGGMTAAAA	http://jaspar2022.genereg.net/matrix/MA0314.2	HAP3	CCAAT-binding	Heteromeric CCAAT-binding	Saccharomyces cerevisiae	fungi	P13434	Transcriptional activator HAP3	Acts a component of the CCAT-binding factor, which is a transcriptional activator and binds to the upstream activation site (UAS2) of the CYC1 gene and other genes involved in mitochondrial electron transport and activates their expression. Recognizes the sequence 5'-CCAAT-3'	Saccharomyces cerevisiae (strain ATCC 204508 / S288c)	sce:YBL021C
548	Chaperone tailless complex polypeptide 1 (TCP-1)	TCP-1 Chaperone	MA1933.1	ARACGVASCGRAARTGA	http://jaspar2022.genereg.net/matrix/MA1933.1	ELK1::SREBF2	Tryptophan CF, bHLH	Ets-related, bHLH-ZIP	Homo sapiens	vertebrates	P19419	ETS domain-containing protein Elk-1	Transcription factor that binds to purine-rich DNA sequences (PubMed:10799319, PubMed:7889942). Forms a ternary complex with SRF and the ETS and SRF motifs of the serum response element (SRE) on the promoter region of immediate early genes such as FOS and IER2 (PubMed:1630903). Induces target gene transcription upon JNK and MAPK-signaling pathways stimulation (PubMed:7889942)	Homo sapiens	hsa:2002
566	ATP-binding cassette sub-family F member, EF3 subfamily	ABC Transporter	MA0951.1	ASAGCCAATCRTTT	http://jaspar2022.genereg.net/matrix/MA0951.1	ATHB-16	HDF	HD-ZIP	Arabidopsis thaliana	plants	Q940J1	Homeobox-leucine zipper protein ATHB-16	Probable transcription factor that may function as a negative regulator of the flowering time response to photoperiod. May act to repress cell expansion during plant development	Arabidopsis thaliana	ath:AT4G40060
592	Small ribosomal subunit protein eS10	Ribosome eS10	MA0840.1	GACGTCATGCCYTTRAA	http://jaspar2022.genereg.net/matrix/MA0840.1	Creb5	bZIP	CREB-related factors	Mus musculus	vertebrates	Q8K1L0	Cyclic AMP-responsive element-binding protein 5	Binds to the cAMP response element and activates transcription	Mus musculus	mmu:231991
446279	Heat shock protein 70 family, 26S Proteasome Regulatory ATPase	HSP70, 26S ATPase	MA0962.1	RACGACGCGTGGCAG, GCGTCCTGCGTCACGTG	http://jaspar2022.genereg.net/matrix/MA0962.1	BHLH34	bHLH		Arabidopsis thaliana	plants	Q9LTC7	Transcription factor bHLH34	.	Arabidopsis thaliana	ath:AT3G23210
529412	DNA-directed RNA polymerase subunit/transcription factor S , Cys/Met metabolism, PPD enzyme	RNA Polymerase,Cys/Met Enzyme	MA0516.3	GKGGGGMAGGGAG, GGCGGGAA	http://jaspar2022.genereg.net/matrix/MA0516.3	SP2	SP2	Three-zinc finger Kruppel-related	Homo sapiens	vertebrates	Q02086	Transcription factor Sp2	Binds to GC box promoters elements and selectively activates mRNA synthesis from genes that contain functional recognition sites	Homo sapiens	hsa:6668

## Sheet: legend_2
Known_motifs_upstream: This table presents motif matches identified using TOMTOM against the JASPAR database, mapping enriched DNA motifs from MEME to their putative transcription factor (TF) regulators. Each row links a cluster-level motif with a potential TF target, including functional annotation from UniProt and KEGG.
Cluster_ID: Gene cluster ID containing the motif of interest.
Description and short_name: The cluster enriched with protein family ( short name for heatmap)
TOMTOM_Name: Name of the predicted transcription factor from TOMTOM analysis. Names in bold letters are from JASPAR 2022 core non-redundant database.
TOMTOM_Target_ID: JASPAR matrix ID representing the best match for the motif.
TOMTOM_URL: Link to the JASPAR matrix profile page for the matched motif.
Class / Family: Classification of TF binding domains (e.g., bHLH, bZIP, HDF), and family assignments such as HD-ZIP, Fos-related, or CREB-related.
Motif_Sequence(s): Consensus motif(s) enriched in the cluster (from MEME).
Organism: Full scientific name of the TF’s source organism.
Protein_Name: Protein name of the matched TF.
Species: Organism from which the matched TF originates.
Taxon: Broad biological category (plants, vertebrates, insects).
Uniprot_Function: Detailed description of the TF’s biological role from UniProt.
UniProt_ID: Unique protein identifier in UniProt database.
KEGG_Pathways: KEGG identifiers for pathways the TF is involved in.

## Sheet: Motifs_protein_family_JASPAR
Co-ordinates of Known motif (matched with JASPAR database) occurrences using MAST tool of MEME-suite
Cluster_ID	PANTHER_ID	Description	sequence_name	(strand+/-)motif	id	name	hit_start	hit_end	score	hit_p-value
14	PTHR11921	Succinate Dehydrogenase/Fumarate Reductase Iron-Sulfur	CEG35346	8	TTCAAGTGBCGCARAA	tin	784	799	2108.64	1.1e-07
14	PTHR11921	Succinate Dehydrogenase/Fumarate Reductase Iron-Sulfur	HpaG806065	8	TTCAAGTGBCGCARAA	tin	603	618	1633.92	6.56e-07
14	PTHR11921	Succinate Dehydrogenase/Fumarate Reductase Iron-Sulfur	PHYSODRAFT_353902	8	TTCAAGTGBCGCARAA	tin	717	732	2616.48	4.97e-10
14	PTHR11921	Succinate Dehydrogenase/Fumarate Reductase Iron-Sulfur	PITG_10951	8	TTCAAGTGBCGCARAA	tin	750	765	2351.52	1.37e-08
14	PTHR11921	Succinate Dehydrogenase/Fumarate Reductase Iron-Sulfur	PYU1_T003423	8	TTCAAGTGBCGCARAA	tin	784	799	2406.72	8.16e-09
20	PTHR23316	Importin Alpha	CEG35425	10	GTGTGGDCCACA	Zm00001d038683	896	907	2229.75	1.29e-07
20	PTHR23316	Importin Alpha	HpaG807508	10	GTGTGGDCCACA	Zm00001d038683	896	907	2315.75	4.56e-08
20	PTHR23316	Importin Alpha	PHYSODRAFT_354318	10	GTGTGGDCCACA	Zm00001d038683	937	948	2315.75	4.56e-08
20	PTHR23316	Importin Alpha	PITG_17452	10	GTGTGGDCCACA	Zm00001d038683	976	987	2315.75	4.56e-08
36	PTHR11910	ATPase, OSCP/delta subunit	CEG35716	2	CGTCAAAGCG	PBF	268	277	1617.36	4.06e-06
36	PTHR11910	ATPase, OSCP/delta subunit	HpaG803739	2	CGTCAAAGCG	PBF	267	276	1440.72	1.07e-05
36	PTHR11910	ATPase, OSCP/delta subunit	PHYSODRAFT_351290	2	CGTCAAAGCG	PBF	287	296	1628.4	3.16e-06
36	PTHR11910	ATPase, OSCP/delta subunit	PITG_15526	2	CGTCAAAGCG	PBF	305	314	1816.08	7.76e-07
36	PTHR11910	ATPase, OSCP/delta subunit	PYU1_T012292	2	CGTCAAAGCG	PBF	907	916	1650.48	2.51e-06
61	PTHR43180	3-Oxoacyl-(Acyl-Carrier-Protein) Reductase	CEG36197	10	TGGCAGCATG	NFIC::TLX1	20	29	1436	1.11e-05
61	PTHR43180	3-Oxoacyl-(Acyl-Carrier-Protein) Reductase	HpaG802032	10	TGGCAGCATG	NFIC::TLX1	481	490	1843	7.59e-07
61	PTHR43180	3-Oxoacyl-(Acyl-Carrier-Protein) Reductase	PHYSODRAFT_353512	10	TGGCAGCATG	NFIC::TLX1	668	677	1458	5.78e-06
61	PTHR43180	3-Oxoacyl-(Acyl-Carrier-Protein) Reductase	PITG_03463	10	TGGCAGCATG	NFIC::TLX1	746	755	1843	7.59e-07
61	PTHR43180	3-Oxoacyl-(Acyl-Carrier-Protein) Reductase	PYU1_T002219	10	TGGCAGCATG	NFIC::TLX1	335	344	1634	4.51e-06
61	PTHR43180	3-Oxoacyl-(Acyl-Carrier-Protein) Reductase	CEG36197	5	TCAMWTTTGTG	Inr	257	267	1760	2.23e-06
61	PTHR43180	3-Oxoacyl-(Acyl-Carrier-Protein) Reductase	HpaG802032	5	TCAMWTTTGTG	Inr	182	192	1914	6.66e-07
61	PTHR43180	3-Oxoacyl-(Acyl-Carrier-Protein) Reductase	PHYSODRAFT_353512	5	TCAMWTTTGTG	Inr	488	498	1716	2.48e-06
61	PTHR43180	3-Oxoacyl-(Acyl-Carrier-Protein) Reductase	PITG_03463	5	TCAMWTTTGTG	Inr	636	646	1903	1.03e-06
61	PTHR43180	3-Oxoacyl-(Acyl-Carrier-Protein) Reductase	PYU1_T002219	5	TCAMWTTTGTG	Inr	193	203	1694	3.87e-06
63	PTHR23305	OBG GTPase Family	CEG36239	3	GACTGACAGCACCAMGT	hth	199	215	3149.25	5.2e-11
63	PTHR23305	OBG GTPase Family	HpaG802100	3	GACTGACAGCACCAMGT	hth	58	74	2873	6.83e-10
63	PTHR23305	OBG GTPase Family	PHYSODRAFT_551993	3	GACTGACAGCACCAMGT	hth	97	113	3149.25	5.2e-11
63	PTHR23305	OBG GTPase Family	PITG_03424	3	GACTGACAGCACCAMGT	hth	123	139	3149.25	5.2e-11
63	PTHR23305	OBG GTPase Family	PYU1_T000771	3	GACTGACAGCACCAMGT	hth	284	300	2066.35	7.86e-09
82	PTHR11227	WD-REPEAT PROTEIN INTERACTING WITH PHOSPHOINOSIDES WIPI -RELATED	CEG36698	9	ATTTTKCNTTT	FPR	896	906	1776.9	3.6e-06
82	PTHR11227	WD-REPEAT PROTEIN INTERACTING WITH PHOSPHOINOSIDES WIPI -RELATED	HpaG808127	9	ATTTTKCNTTT	FPR	517	527	1788	3.05e-06
82	PTHR11227	WD-REPEAT PROTEIN INTERACTING WITH PHOSPHOINOSIDES WIPI -RELATED	PHYSODRAFT_353896	9	ATTTTKCNTTT	FPR	798	808	1743.6	4.49e-06
82	PTHR11227	WD-REPEAT PROTEIN INTERACTING WITH PHOSPHOINOSIDES WIPI -RELATED	PITG_18011	9	ATTTTKCNTTT	FPR	789	799	1954.5	4.45e-07
82	PTHR11227	WD-REPEAT PROTEIN INTERACTING WITH PHOSPHOINOSIDES WIPI -RELATED	PYU1_T005574	9	ATTTTKCNTTT	FPR	512	522	1654.8	6.3e-06
90	PTHR10113	Peptide chain release factor eRF1/aRF1	CEG36901	8	AATKGMAAWDTKCCAA	NFIC::TLX1	830	845	2260.74	6.9e-08
90	PTHR10113	Peptide chain release factor eRF1/aRF1	HpaG810609	8	AATKGMAAWDTKCCAA	NFIC::TLX1	335	350	2381.52	2.14e-08
90	PTHR10113	Peptide chain release factor eRF1/aRF1	PHYSODRAFT_547793	8	AATKGMAAWDTKCCAA	NFIC::TLX1	891	906	1920.36	3.56e-07
90	PTHR10113	Peptide chain release factor eRF1/aRF1	PITG_12535	8	AATKGMAAWDTKCCAA	NFIC::TLX1	606	621	2469.36	8.74e-09
90	PTHR10113	Peptide chain release factor eRF1/aRF1	PYU1_T014761	8	AATKGMAAWDTKCCAA	NFIC::TLX1	68	83	2425.44	1.4e-08
91	PTHR10529	Adaptor complexes medium subunit	CEG36910	1	TTGACGTGGCA	bHLHE41	960	970	2166.28	2.02e-07
91	PTHR10529	Adaptor complexes medium subunit	HpaG802202	1	TTGACGTGGCA	bHLHE41	967	977	1757.06	7.37e-07
91	PTHR10529	Adaptor complexes medium subunit	PHYSODRAFT_557715	1	TTGACGTGGCA	bHLHE41	963	973	2166.28	2.02e-07
91	PTHR10529	Adaptor complexes medium subunit	PITG_09875	1	TTGACGTGGCA	bHLHE41	951	961	2166.28	2.02e-07
91	PTHR10529	Adaptor complexes medium subunit	PYU1_T002584	1	TTGACGTGGCA	bHLHE41	791	801	2166.28	2.02e-07
104	PTHR43176	Enoyl-CoA hydratase/isomerase	HpaG813693	4	AGACWBAGCAGCTGHAG	hlh-1	587	603	2988.9	3.48e-10
104	PTHR43176	Enoyl-CoA hydratase/isomerase	PHYSODRAFT_554783	4	AGACWBAGCAGCTGHAG	hlh-1	529	545	2802.07	2.34e-09
104	PTHR43176	Enoyl-CoA hydratase/isomerase	PITG_02112	4	AGACWBAGCAGCTGHAG	hlh-1	649	665	2922.96	8.15e-10
104	PTHR43176	Enoyl-CoA hydratase/isomerase	PYU1_T012895	4	AGACWBAGCAGCTGHAG	hlh-1	441	457	2758.11	3.05e-09
113	PTHR24089	Solute Carrier Family 25	CEG37284	8	TCYGCGTGGATGWACAG	Ahr::Arnt (Inr+FPR)	737	753	3059.76	4.72e-11
113	PTHR24089	Solute Carrier Family 25	HpaG808542	8	TCYGCGTGGATGWACAG	Ahr::Arnt (Inr+FPR)	606	622	2902.12	3.41e-10
113	PTHR24089	Solute Carrier Family 25	PHYSODRAFT_346270	8	TCYGCGTGGATGWACAG	Ahr::Arnt (Inr+FPR)	597	613	2924.64	2.34e-10
113	PTHR24089	Solute Carrier Family 25	PITG_17490	8	TCYGCGTGGATGWACAG	Ahr::Arnt (Inr+FPR)	672	688	2969.68	1.36e-10
113	PTHR24089	Solute Carrier Family 25	PYU1_T005961	8	TCYGCGTGGATGWACAG	Ahr::Arnt (Inr+FPR)	268	284	2147.7	1.05e-08
141	PTHR32194	Proteasome B-type subunit	CEG37743	2	TTCCTATAATTAAGGAG	al	221	237	3484.98	1.06e-10
141	PTHR32194	Proteasome B-type subunit	PHYSODRAFT_286698	2	TTCCTATAATTAAGGAG	al	181	197	3484.98	1.06e-10
141	PTHR32194	Proteasome B-type subunit	PITG_09706	2	TTCCTATAATTAAGGAG	al	50	66	3484.98	1.06e-10
141	PTHR32194	Proteasome B-type subunit	CEG37743	6	TCGTTGACCATGMTDCT	WRKY38	411	427	2648.04	2.14e-09
141	PTHR32194	Proteasome B-type subunit	HpaG814699	6	TCGTTGACCATGMTDCT	WRKY38	156	172	1880.07	1.27e-07
141	PTHR32194	Proteasome B-type subunit	PHYSODRAFT_286698	6	TCGTTGACCATGMTDCT	WRKY38	386	402	2870.64	1.29e-10
141	PTHR32194	Proteasome B-type subunit	PITG_09706	6	TCGTTGACCATGMTDCT	WRKY38	257	273	2692.56	1.15e-09
141	PTHR32194	Proteasome B-type subunit	PYU1_T011788	6	TCGTTGACCATGMTDCT	WRKY38	416	432	2213.97	4.65e-08
167	PTHR11808	Cys/Met metabolism, pyridoxal phosphate-dependent enzyme	HpaG803975	3	CAGCAGAAACGAGG	CUP2	334	347	2216.62	6.85e-08
167	PTHR11808	Cys/Met metabolism, pyridoxal phosphate-dependent enzyme	HpaG803975	8	CCAATSRGATCTTKR	NFYA	818	832	2196	6.83e-08
167	PTHR11808	Cys/Met metabolism, pyridoxal phosphate-dependent enzyme	PHYSODRAFT_299659	3	CAGCAGAAACGAGG	CUP2	645	658	2378.32	2.49e-08
167	PTHR11808	Cys/Met metabolism, pyridoxal phosphate-dependent enzyme	PHYSODRAFT_299659	8	CCAATSRGATCTTKR	NFYA	857	871	2362.5	1.21e-08
167	PTHR11808	Cys/Met metabolism, pyridoxal phosphate-dependent enzyme	PITG_08445	3	CAGCAGAAACGAGG	CUP2	583	596	2227.4	5.77e-08
167	PTHR11808	Cys/Met metabolism, pyridoxal phosphate-dependent enzyme	PITG_08445	8	CCAATSRGATCTTKR	NFYA	878	892	2406.9	5.99e-09
167	PTHR11808	Cys/Met metabolism, pyridoxal phosphate-dependent enzyme	PYU1_T006888	3	CAGCAGAAACGAGG	CUP2	78	91	2399.88	1.02e-08
167	PTHR11808	Cys/Met metabolism, pyridoxal phosphate-dependent enzyme	PYU1_T006888	8	CCAATSRGATCTTKR	NFYA	396	410	2062.8	1.65e-07
167	PTHR43797	HOMOCYSTEINE/CYSTEINE SYNTHASE	XM_031217902	8	CCAATSRGATCTTKR	NFYA	320	334	1785.3	5.83e-07
172	PTHR43511	UTP-glucose-1-phosphate uridylyltransferase	CEG38253	10	CGCACGYGYCTGGAGCT	HES5	799	815	2433.06	4.86e-09
172	PTHR43511	UTP-glucose-1-phosphate uridylyltransferase	HpaG803442	10	CGCACGYGYCTGGAGCT	HES5	629	645	2499.12	2.77e-09
172	PTHR43511	UTP-glucose-1-phosphate uridylyltransferase	PHYSODRAFT_510163	10	CGCACGYGYCTGGAGCT	HES5	495	511	2917.5	2.17e-11
172	PTHR43511	UTP-glucose-1-phosphate uridylyltransferase	PITG_16359	10	CGCACGYGYCTGGAGCT	HES5	596	612	2862.45	7.45e-11
172	PTHR43511	UTP-glucose-1-phosphate uridylyltransferase	PYU1_T012682	10	CGCACGYGYCTGGAGCT	HES5	103	119	1948.62	3.3e-08
203	PTHR11278	Small ribosomal subunit protein eS7	CEG38672	5	CGTTTTGCTCAVHGA	MAC1	967	981	2400.9	1.24e-08
203	PTHR11278	Small ribosomal subunit protein eS7	HpaG810567	5	CGTTTTGCTCAVHGA	MAC1	963	977	2465.1	8.21e-09
203	PTHR11278	Small ribosomal subunit protein eS7	PITG_14850	5	CGTTTTGCTCAVHGA	MAC1	898	912	2186.9	6.72e-08
203	PTHR11278	Small ribosomal subunit protein eS7	PYU1_T014276	5	CGTTTTGCTCAVHGA	MAC1	968	982	2358.1	2.1e-08
249	PTHR10414	Choline/ethanolamine phosphotransferase	CEG39698	8	CGCCTCCARMTGCAAGT	ERF1B	474	490	2818.5	4.77e-11
249	PTHR10414	Choline/ethanolamine phosphotransferase	CEG39698	10	GABATTTTTYT	LHY	680	690	2085.7	1.43e-06
249	PTHR10414	Choline/ethanolamine phosphotransferase	CEG39698	9	CGDCGGTGATGRCGVWG	ERF038	843	859	2479.05	2.47e-09
249	PTHR10414	Choline/ethanolamine phosphotransferase	HpaG803216	9	CGDCGGTGATGRCGVWG	ERF038	28	44	2654.25	2.01e-10
249	PTHR10414	Choline/ethanolamine phosphotransferase	HpaG803216	8	CGCCTCCARMTGCAAGT	ERF1B	970	986	2161.5	2.99e-08
249	PTHR10414	Choline/ethanolamine phosphotransferase	PHYSODRAFT_309941	9	CGDCGGTGATGRCGVWG	ERF038	241	257	2227.2	2.47e-08
249	PTHR10414	Choline/ethanolamine phosphotransferase	PHYSODRAFT_309941	8	CGCCTCCARMTGCAAGT	ERF1B	335	351	2161.5	2.99e-08
249	PTHR10414	Choline/ethanolamine phosphotransferase	PHYSODRAFT_309941	10	GABATTTTTYT	LHY	475	485	2096.11	9.88e-07
249	PTHR10414	Choline/ethanolamine phosphotransferase	PITG_02842	8	CGCCTCCARMTGCAAGT	ERF1B	421	437	2621.4	7.38e-10
249	PTHR10414	Choline/ethanolamine phosphotransferase	PITG_02842	9	CGDCGGTGATGRCGVWG	ERF038	772	788	1931.55	1.03e-07
249	PTHR10414	Choline/ethanolamine phosphotransferase	PITG_02842	10	GABATTTTTYT	LHY	875	885	1992.01	1.88e-06
249	PTHR10414	Choline/ethanolamine phosphotransferase	PYU1_T008371	9	CGDCGGTGATGRCGVWG	ERF038	211	227	2281.95	1.6e-08
249	PTHR10414	Choline/ethanolamine phosphotransferase	PYU1_T008371	8	CGCCTCCARMTGCAAGT	ERF1B	353	369	2139.6	3.27e-08
279	PTHR23073	26S Proteasome Regulatory ATPase	CEG40302	4	GCGTCCTGCGTCACGTG	BHLH34	830	846	2619.6	7.11e-10
279	PTHR23073	26S Proteasome Regulatory ATPase	HpaG803144	4	GCGTCCTGCGTCACGTG	BHLH34	717	733	3016.68	1.49e-10
279	PTHR23073	26S Proteasome Regulatory ATPase	PHYSODRAFT_546373	4	GCGTCCTGCGTCACGTG	BHLH34	793	809	3215.22	2.64e-11
279	PTHR23073	26S Proteasome Regulatory ATPase	PITG_00613	4	GCGTCCTGCGTCACGTG	BHLH34	814	830	3005.65	1.82e-10
279	PTHR23073	26S Proteasome Regulatory ATPase	PYU1_T004326	4	GCGTCCTGCGTCACGTG	BHLH34	649	665	3215.22	2.64e-11
304	PTHR21396	Large ribosomal subunit protein mL43	CEG40921	1	AACCCATACACRTCRTT	RAP1	429	445	3138.22	2.78e-10
304	PTHR21396	Large ribosomal subunit protein mL43	HpaG807598	1	AACCCATACACRTCRTT	RAP1	306	322	3016.23	3.81e-10
304	PTHR21396	Large ribosomal subunit protein mL43	PHYSODRAFT_284634	1	AACCCATACACRTCRTT	RAP1	365	381	3226.94	5.59e-11
304	PTHR21396	Large ribosomal subunit protein mL43	PITG_02494	1	AACCCATACACRTCRTT	RAP1	412	428	3182.58	1.94e-10
304	PTHR21396	Large ribosomal subunit protein mL43	PYU1_T004536	1	AACCCATACACRTCRTT	RAP1	64	80	2994.05	5.23e-10
310	PTHR11193	Small nuclear ribonucleoprotein E	CEG41094	5	TTTYRGCCAATMAAA	NFYB	801	815	1970.8	2.99e-07
310	PTHR11193	Small nuclear ribonucleoprotein E	HpaG811387	5	TTTYRGCCAATMAAA	NFYB	406	420	1827.15	5.09e-07
310	PTHR11193	Small nuclear ribonucleoprotein E	PHYSODRAFT_486753	5	TTTYRGCCAATMAAA	NFYB	611	625	2224.95	5.24e-08
310	PTHR11193	Small nuclear ribonucleoprotein E	PITG_05666	5	TTTYRGCCAATMAAA	NFYB	638	652	2302.3	1.84e-08
310	PTHR11193	Small nuclear ribonucleoprotein E	PYU1_T005394	5	TTTYRGCCAATMAAA	NFYB	688	702	2479.1	1.4e-09
332	PTHR17602	Ribosomal biogenesis regulatory protein	CEG41616	2	CTGCTGGTTG	SWI5	733	742	1503.75	9.04e-06
332	PTHR17602	Ribosomal biogenesis regulatory protein	HpaG804039	2	CTGCTGGTTG	SWI5	3	12	1751.25	1.85e-06
332	PTHR17602	Ribosomal biogenesis regulatory protein	PHYSODRAFT_526169	2	CTGCTGGTTG	SWI5	935	944	1920	6.84e-07
332	PTHR17602	Ribosomal biogenesis regulatory protein	PITG_04384	2	CTGCTGGTTG	SWI5	774	783	1470	1e-05
332	PTHR17602	Ribosomal biogenesis regulatory protein	PYU1_T012429	2	CTGCTGGTTG	SWI5	860	869	1920	6.84e-07
340	PTHR10681	Thiol-specific antioxidant peroxiredoxin	CEG41822	1	AAYDGGNGAGATGCRGG	ZNF816	937	953	2001.74	2.13e-07
340	PTHR10681	Thiol-specific antioxidant peroxiredoxin	HpaG802944	1	AAYDGGNGAGATGCRGG	ZNF816	571	587	2538.38	1.56e-09
340	PTHR10681	Thiol-specific antioxidant peroxiredoxin	PHYSODRAFT_284682	1	AAYDGGNGAGATGCRGG	ZNF816	745	761	2292.42	2.78e-08
340	PTHR10681	Thiol-specific antioxidant peroxiredoxin	PITG_15492	1	AAYDGGNGAGATGCRGG	ZNF816	444	460	2460.12	4.6e-09
340	PTHR10681	Thiol-specific antioxidant peroxiredoxin	PYU1_T007233	1	AAYDGGNGAGATGCRGG	ZNF816	855	871	1845.22	4.12e-07
346	PTHR45788	Tricarboxylate transport protein-like	CEG42052	6	YGGYGACGHSRSYGACG	Atf3	553	569	1794.26	4.86e-07
346	PTHR45788	Tricarboxylate transport protein-like	HpaG806270	6	YGGYGACGHSRSYGACG	Atf3	659	675	1760.33	6.09e-07
346	PTHR45788	Tricarboxylate transport protein-like	PHYSODRAFT_352008	6	YGGYGACGHSRSYGACG	Atf3	214	230	2291.9	1.14e-08
346	PTHR45788	Tricarboxylate transport protein-like	PITG_14935	6	YGGYGACGHSRSYGACG	Atf3	479	495	2518.1	5.84e-10
346	PTHR45788	Tricarboxylate transport protein-like	PYU1_T011877	6	YGGYGACGHSRSYGACG	Atf3	565	581	2043.08	1.01e-07
346	PTHR45624	MITOCHONDRIAL BASIC AMINO ACIDS TRANSPORTER-RELATED	PBRA_005298	6	YGGYGACGHSRSYGACG	Atf3	662	678	2077.01	8.51e-08
360	PTHR22734	U3 snoRNP protein/Ribosome production factor 1	CEG42354	8	AGYTTTGTCTDTT	IDD5	187	199	1639.08	1.49e-06
360	PTHR22734	U3 snoRNP protein/Ribosome production factor 2	HpaG811357	8	AGYTTTGTCTDTT	IDD5	119	131	2035.44	2.16e-07
360	PTHR22734	U3 snoRNP protein/Ribosome production factor 3	PHYSODRAFT_481255	8	AGYTTTGTCTDTT	IDD5	10	22	2145.54	1e-07
360	PTHR22734	U3 snoRNP protein/Ribosome production factor 4	PITG_05630	8	AGYTTTGTCTDTT	IDD5	614	626	2145.54	1e-07
360	PTHR22734	U3 snoRNP protein/Ribosome production factor 5	PYU1_T005359	8	AGYTTTGTCTDTT	IDD5	837	849	2134.53	1.19e-07
394	PTHR22874	Activating Molecule in BECN1-Regulated Autophagy	PHYSODRAFT_556290	10	CYCCCCTCG	MAZ	985	993	1711.63	4.03e-06
394	PTHR22874	Activating Molecule in BECN1-Regulated Autophagy	PYU1_T005357	10	CYCCCCTCG	MAZ	930	938	1721.3	1.81e-06
412	PTHR11808	Cys/Met metabolism, pyridoxal phosphate-dependent enzyme	PITG_13402	7	CAGCCTGTGGC	MET28	32	42	2261.4	1.33e-07
412	PTHR43797	HOMOCYSTEINE/CYSTEINE SYNTHASE	XM_031217902	7	CAGCCTGTGGC	MET28	299	309	2261.4	1.33e-07
414	PTHR43321	Glutamate decarboxylase	CEG43673	3	AGCCBGCGGTGCCTGC	ZNF708	271	286	2504.31	2.59e-09
414	PTHR43321	Glutamate decarboxylase	HpaG812287	3	AGCCBGCGGTGCCTGC	ZNF708	323	338	1854.72	1.41e-07
414	PTHR43321	Glutamate decarboxylase	PHYSODRAFT_353780	3	AGCCBGCGGTGCCTGC	ZNF708	23	38	2768.55	1.75e-10
414	PTHR43321	Glutamate decarboxylase	PITG_02594	3	AGCCBGCGGTGCCTGC	ZNF708	132	147	2570.37	2.02e-09
414	PTHR43321	Glutamate decarboxylase	PYU1_T004494	3	AGCCBGCGGTGCCTGC	ZNF708	621	636	2229.06	2.57e-08
429	PTHR18860	14-3-3 protein	CEG44130	2	GTGCTGTGGGGTTGCAR	MET28	730	746	2181.56	3.38e-08
429	PTHR18860	14-3-3 protein	HpaG803710	2	GTGCTGTGGGGTTGCAR	MET28	689	705	2845.16	1.79e-10
429	PTHR18860	14-3-3 protein	PHYSODRAFT_353822	2	GTGCTGTGGGGTTGCAR	MET28	763	779	3033.18	3.95e-11
429	PTHR18860	14-3-3 protein	PITG_19017	2	GTGCTGTGGGGTTGCAR	MET28	798	814	2789.86	5.95e-10
429	PTHR18860	14-3-3 protein	PYU1_T003542	2	GTGCTGTGGGGTTGCAR	MET28	730	746	2214.74	2.81e-08
429	PTHR18860	14-3-3 protein	CEG44130	8	TGCAGCTG	ATOH1	638	645	1362.32	2.39e-05
429	PTHR18860	14-3-3 protein	HpaG803710	8	TGCAGCTG	ATOH1	786	793	1572.46	1.2e-05
429	PTHR18860	14-3-3 protein	PHYSODRAFT_353822	8	TGCAGCTG	ATOH1	837	844	1572.46	1.2e-05
429	PTHR18860	14-3-3 protein	PITG_19017	8	TGCAGCTG	ATOH1	882	889	1572.46	1.2e-05
429	PTHR18860	14-3-3 protein	PYU1_T003542	8	TGCAGCTG	ATOH1	890	897	1572.46	1.2e-05
446	PTHR19375	Heat shock protein 70 family	CEG44469	1	RACGACGCGTGGCAG	BHLH34	788	802	2568.92	4.8e-09
446	PTHR19375	Heat shock protein 70 family	CEG44469	2	TTTCTAGAAGMCMCGT	Hsf1-2-4	851	866	2706.08	1.78e-09
446	PTHR19375	Heat shock protein 70 family	CEG44469	7	GCAGCAGGC	ASCL1	930	938	1334.52	1.47e-05
446	PTHR19375	Heat shock protein 70 family	HpaG801005	7	GCAGCAGGC	ASCL1	33	41	1534.68	7.11e-06
446	PTHR19375	Heat shock protein 70 family	HpaG801005	1	RACGACGCGTGGCAG	BHLH34	725	739	2235.32	2.4e-08
446	PTHR19375	Heat shock protein 70 family	HpaG801005	2	TTTCTAGAAGMCMCGT	Hsf1-2-4	797	812	2795.04	1.04e-09
446	PTHR19375	Heat shock protein 70 family	PHYSODRAFT_286376	7	GCAGCAGGC	ASCL1	424	432	1745.96	2.21e-06
446	PTHR19375	Heat shock protein 70 family	PHYSODRAFT_286376	1	RACGACGCGTGGCAG	BHLH34	763	777	2791.32	4.28e-10
446	PTHR19375	Heat shock protein 70 family	PHYSODRAFT_286376	2	TTTCTAGAAGMCMCGT	Hsf1-2-4	833	848	2906.24	2.58e-10
446	PTHR19375	Heat shock protein 70 family	PITG_00527	7	GCAGCAGGC	ASCL1	215	223	1745.96	2.21e-06
446	PTHR19375	Heat shock protein 70 family	PITG_00527	1	RACGACGCGTGGCAG	BHLH34	781	795	2513.32	6.92e-09
446	PTHR19375	Heat shock protein 70 family	PITG_00527	2	TTTCTAGAAGMCMCGT	Hsf1-2-4	851	866	2906.24	2.58e-10
446	PTHR19375	Heat shock protein 70 family	PYU1_T004108	7	GCAGCAGGC	ASCL1	692	700	1745.96	2.21e-06
446	PTHR19375	Heat shock protein 70 family	PYU1_T004108	1	RACGACGCGTGGCAG	BHLH34	714	728	2580.04	4.16e-09
446	PTHR19375	Heat shock protein 70 family	PYU1_T004108	2	TTTCTAGAAGMCMCGT	Hsf1-2-4	789	804	2183.44	1.57e-08
446	PTHR19375	Heat shock protein 70 family	CEG44469	3	GCCACGTMAGCA	TYE7	886	897	2257.52	8.67e-08
446	PTHR19375	Heat shock protein 70 family	HpaG801005	3	GCCACGTMAGCA	TYE7	843	854	2302	3.82e-08
446	PTHR19375	Heat shock protein 70 family	PHYSODRAFT_286376	3	GCCACGTMAGCA	TYE7	869	880	2302	3.82e-08
446	PTHR19375	Heat shock protein 70 family	PITG_00527	3	GCCACGTMAGCA	TYE7	887	898	2302	3.82e-08
446	PTHR19375	Heat shock protein 70 family	PYU1_T004108	3	GCCACGTMAGCA	TYE7	843	854	2035.12	1.88e-07
454	PTHR11711	Small GTPase superfamily, ARF type	CEG44697	2	TGCTCAAGTGTCTDATC	tin	474	490	2972.55	4.7e-10
454	PTHR11711	Small GTPase superfamily, ARF type	HpaG800486	2	TGCTCAAGTGTCTDATC	tin	401	417	3159.72	1.19e-10
454	PTHR11711	Small GTPase superfamily, ARF type	PHYSODRAFT_314739	2	TGCTCAAGTGTCTDATC	tin	171	187	3159.72	1.19e-10
454	PTHR11711	Small GTPase superfamily, ARF type	PITG_20206	2	TGCTCAAGTGTCTDATC	tin	442	458	3170.73	5.35e-11
454	PTHR11711	Small GTPase superfamily, ARF type	PYU1_T008671	2	TGCTCAAGTGTCTDATC	tin	676	692	2488.11	3.11e-09
462	PTHR45624	Mitochondrial Carrier	CEG44792	8	CMRATGCAGCASSNAC	GRF4	215	230	1903.84	2.55e-07
462	PTHR45624	Mitochondrial Carrier	HpaG813355	8	CMRATGCAGCASSNAC	GRF4	281	296	1712.08	7.36e-07
462	PTHR45624	Mitochondrial Carrier	PHYSODRAFT_355004	8	CMRATGCAGCASSNAC	GRF4	5	20	1881.28	2.96e-07
462	PTHR45624	Mitochondrial Carrier	PITG_09538	8	CMRATGCAGCASSNAC	GRF4	507	522	2197.12	1.85e-08
462	PTHR45624	Mitochondrial Carrier	PYU1_T013142	8	CMRATGCAGCASSNAC	GRF4	655	670	1813.6	4.14e-07
462	PTHR45624	Mitochondrial Carrier	PBRA_005298	8	CMRATGCAGCASSNAC	GRF4	695	710	2524.24	3.17e-10
510	PTHR12262	CCR4-NOT transcription complex subunit 9	PHYSODRAFT_559218	-10	GAGGCAAG	ZNF257	134	141	1657.44	1.2e-05
510	PTHR12262	CCR4-NOT transcription complex subunit 9	PITG_15281	10	GAGGCAAG	ZNF257	647	654	1657.44	1.2e-05
510	PTHR12262	CCR4-NOT transcription complex subunit 9	PYU1_T012909	10	GAGGCAAG	ZNF257	596	603	1657.44	1.2e-05
525	PTHR43102	SLR1143 Protein	CEG46180	2	CGTGTACACRCGTG	OJ1058_F05.8	743	756	2418.18	1.36e-08
525	PTHR43102	SLR1143 Protein	HpaG807827	2	CGTGTACACRCGTG	OJ1058_F05.8	721	734	2561.44	5.13e-09
525	PTHR43102	SLR1143 Protein	PHYSODRAFT_354133	2	CGTGTACACRCGTG	OJ1058_F05.8	824	837	2396.14	1.55e-08
525	PTHR43102	SLR1143 Protein	PITG_12327	2	CGTGTACACRCGTG	OJ1058_F05.8	984	997	2616.54	2.31e-09
525	PTHR43102	SLR1143 Protein	PYU1_T014002	2	CGTGTACACRCGTG	OJ1058_F05.8	401	414	2175.74	5.37e-08
529	PTHR11239	DNA-directed RNA polymerase subunit/transcription factor S	CEG46280	2	GATTGGMTAAAA	HAP3	935	946	1977.12	9.98e-07
529	PTHR11239	DNA-directed RNA polymerase subunit/transcription factor S	HpaG801854	2	GATTGGMTAAAA	HAP3	944	955	2231.5	8.24e-08
529	PTHR11239	DNA-directed RNA polymerase subunit/transcription factor S	PHYSODRAFT_491179	2	GATTGGMTAAAA	HAP3	926	937	1678.5	2.42e-06
529	PTHR11239	DNA-directed RNA polymerase subunit/transcription factor S	PITG_16526	2	GATTGGMTAAAA	HAP3	916	927	2198.32	1.83e-07
529	PTHR11239	DNA-directed RNA polymerase subunit/transcription factor S	PYU1_T002895	2	GATTGGMTAAAA	HAP3	874	885	2076.66	3.33e-07
529	PTHR11239	DNA-directed RNA polymerase subunit/transcription factor S	PHYSODRAFT_491179	8	GKGGGGMAGGGAG	SP2	743	755	2480.21	2.1e-08
529	PTHR11239	DNA-directed RNA polymerase subunit/transcription factor S	PITG_16526	8	GKGGGGMAGGGAG	SP2	688	700	2489.94	1.54e-08
548	PTHR11353	Chaperone tailless complex polypeptide 1 (TCP-1)	CEG46742	8	ARACGVASCGRAARTGA	ELK1::SREBF2	746	762	2338.13	1.66e-08
548	PTHR11353	Chaperone tailless complex polypeptide 1 (TCP-1)	HpaG804907	8	ARACGVASCGRAARTGA	ELK1::SREBF2	343	359	2382.57	1.07e-08
548	PTHR11353	Chaperone tailless complex polypeptide 1 (TCP-1)	PHYSODRAFT_566801	8	ARACGVASCGRAARTGA	ELK1::SREBF2	635	651	2071.49	1.1e-07
548	PTHR11353	Chaperone tailless complex polypeptide 1 (TCP-1)	PITG_06320	8	ARACGVASCGRAARTGA	ELK1::SREBF2	454	470	2304.8	2.16e-08
548	PTHR11353	Chaperone tailless complex polypeptide 1 (TCP-1)	PYU1_T012609	8	ARACGVASCGRAARTGA	ELK1::SREBF2	263	279	2271.47	2.87e-08
566	PTHR19211	ATP-binding cassette sub-family F member, EF3 subfamily	CEG47213	5	ASAGCCAATCRTTT	ATHB-16	767	780	1626.11	1.09e-06
566	PTHR19211	ATP-binding cassette sub-family F member, EF3 subfamily	HpaG807515	5	ASAGCCAATCRTTT	ATHB-16	676	689	2236.06	5.24e-08
566	PTHR19211	ATP-binding cassette sub-family F member, EF3 subfamily	PHYSODRAFT_558930	5	ASAGCCAATCRTTT	ATHB-16	792	805	2380.23	1.44e-08
566	PTHR19211	ATP-binding cassette sub-family F member, EF3 subfamily	PITG_01498	5	ASAGCCAATCRTTT	ATHB-16	786	799	2402.41	9.26e-09
566	PTHR19211	ATP-binding cassette sub-family F member, EF3 subfamily	PYU1_T011982	5	ASAGCCAATCRTTT	ATHB-16	710	723	2147.34	1.22e-07
592	PTHR12146	Small ribosomal subunit protein eS10	CEG47766	4	GACGTCATGCCYTTRAA	Creb5	432	448	2884.05	7.9e-10
592	PTHR12146	Small ribosomal subunit protein eS10	HpaG807022	4	GACGTCATGCCYTTRAA	Creb5	256	272	3171.35	4.77e-11
592	PTHR12146	Small ribosomal subunit protein eS10	PHYSODRAFT_286426	4	GACGTCATGCCYTTRAA	Creb5	384	400	2950.35	3.71e-10
592	PTHR12146	Small ribosomal subunit protein eS10	PITG_00266	4	GACGTCATGCCYTTRAA	Creb5	424	440	3171.35	4.77e-11
592	PTHR12146	Small ribosomal subunit protein eS10	PYU1_T003943	4	GACGTCATGCCYTTRAA	Creb5	119	135	2861.95	9.06e-10

## Sheet: legend_3
Motifs_protein_family_JASPAR: This table lists the genomic positions of transcription factor binding motifs identified in upstream promoter regions across five oomycete species. The motifs were matched to known transcription factor binding profiles from the JASPAR database using MAST (Motif Alignment and Search Tool). Each entry includes the gene cluster ID, PANTHER family ID, functional descript…
Motif Type Categories:
Known motifs (JASPAR)
Cluster 141: Partially conserved motif hits (included in main figures).
Cluster 167: Partially conserved motif hits (included in main figures).
Clusters 20, 104, 249: Partially conserved, not shown in main figures.
Cluster 446: Fully conserved across five species (shown in main figures).
De novo motifs (MEME suite)
Clusters 14, 36, 61, 63, 90, 91, 113, 172, 203, 249, 279, 310, 304, 340, 332, 346, 360, 414, 429, 454, 482, 548, 566, 592: Conserved across five oomycete species but not included in main figures.
Clusters 295, 529: Conserved in cysteine-rich effector-like genes.

## Sheet: Motif_protein_family_MEME
Table 1: Co-ordinates of de novo motif (conserrved found using MEME_suite) occurrences using MAST tool of MEME-suite													Table 2: Co-ordinates of de novo motif (conserrved found using MEME_suite) occurrences using MAST tool of MEME-suite and matched with motifs cited in literature
Cluster_ID	PANTHER_ID	Description	sequence_name	(strand+/-)motif	id	name	hit_start	hit_end	score	hit_p-value			Cluster_ID	PANTHER_ID	Description	sequence_name	(strand+/-)motif	id	name	hit_start	hit_end	score	hit_p-value
176	PTHR11587	ARGININOSUCCINATE SYNTHASE	CEG38287	1	CYTCCACGGYGWGCCSC	MEME-1	458	474	2639.17	1.14e-09			99	PTHR43172	ADENYLOSUCCINATE LYASE	CEG37070	2	TTTTAKCCAAT	CCAAT	775	785	1768.65	2.89e-06
176	PTHR11587	ARGININOSUCCINATE SYNTHASE	HpaG808887	1	CYTCCACGGYGWGCCSC	MEME-1	502	518	2916.42	2.17e-11			99	PTHR43172	ADENYLOSUCCINATE LYASE	CEG37070	7	ACTYTTTTTAAAT	TATA	859	871	2587.24	4.08e-08
176	PTHR11587	ARGININOSUCCINATE SYNTHASE	PHYSODRAFT_485399	1	CYTCCACGGYGWGCCSC	MEME-1	316	332	2605.9	1.7e-09			99	PTHR43172	ADENYLOSUCCINATE LYASE	HpaG808159	-2	TTTTAKCCAAT	CCAAT	516	526	1834.95	1.18e-06
176	PTHR11587	ARGININOSUCCINATE SYNTHASE	PITG_05374	1	CYTCCACGGYGWGCCSC	MEME-1	192	208	2838.79	1.09e-10			99	PTHR43172	ADENYLOSUCCINATE LYASE	PHYSODRAFT_325085	2	TTTTAKCCAAT	CCAAT	882	892	1724.45	4.07e-06
176	PTHR11587	ARGININOSUCCINATE SYNTHASE	PYU1_T005518	1	CYTCCACGGYGWGCCSC	MEME-1	238	254	1973.77	2.16e-08			99	PTHR43172	ADENYLOSUCCINATE LYASE	PITG_17983	2	TTTTAKCCAAT	CCAAT	903	913	1989.65	3.66e-07
203	PTHR11278	Small ribosomal subunit protein eS7	CEG38672	2	CTCAGATCTGAGTCC	MEME-2	898	912	2667.26	3.12e-09			99	PTHR43172	ADENYLOSUCCINATE LYASE	PITG_17983	7	ACTYTTTTTAAAT	TATA	927	939	2567.78	7.43e-08
203	PTHR11278	Small ribosomal subunit protein eS7	CEG38672	1	AATCGACTGGCCAGCAG	MEME-1	919	935	2173.62	3.38e-09			99	PTHR43172	ADENYLOSUCCINATE LYASE	PYU1_T005555	2	TTTTAKCCAAT	CCAAT	831	841	1812.85	1.48e-06
203	PTHR11278	Small ribosomal subunit protein eS7	HpaG810567	2	CTCAGATCTGAGTCC	MEME-2	899	913	2667.26	3.12e-09			104	PTHR43176	3-HYDROXYISOBUTYRYL-COA HYDROLASE-RELATED	CEG37157	2	TCAATNAYCTCAATAAR	Inr+FPR	841	857	2360.67	5.59e-08
203	PTHR11278	Small ribosomal subunit protein eS7	HpaG810567	1	AATCGACTGGCCAGCAG	MEME-1	921	937	3198.48	3.92e-11			104	PTHR43176	3-HYDROXYISOBUTYRYL-COA HYDROLASE-RELATED	HpaG813693	2	TCAATNAYCTCAATAAR	Inr+FPR	272	288	2733.9	7.01e-09
203	PTHR11278	Small ribosomal subunit protein eS7	PHYSODRAFT_286746	2	CTCAGATCTGAGTCC	MEME-2	913	927	2876.64	7.72e-10			104	PTHR43176	3-HYDROXYISOBUTYRYL-COA HYDROLASE-RELATED	PHYSODRAFT_554783	2	TCAATNAYCTCAATAAR	Inr+FPR	217	233	2666.04	1.13e-08
203	PTHR11278	Small ribosomal subunit protein eS7	PHYSODRAFT_286746	1	AATCGACTGGCCAGCAG	MEME-1	934	950	3198.48	3.92e-11			104	PTHR43176	3-HYDROXYISOBUTYRYL-COA HYDROLASE-RELATED	PITG_02112	2	TCAATNAYCTCAATAAR	Inr+FPR	340	356	2982.72	3.88e-10
203	PTHR11278	Small ribosomal subunit protein eS7	PITG_14850	2	CTCAGATCTGAGTCC	MEME-2	920	934	2876.64	7.72e-10			104	PTHR43176	3-HYDROXYISOBUTYRYL-COA HYDROLASE-RELATED	PYU1_T012895	2	TCAATNAYCTCAATAAR	Inr+FPR	4	20	2485.08	3.5e-08
203	PTHR11278	Small ribosomal subunit protein eS7	PITG_14850	1	AATCGACTGGCCAGCAG	MEME-1	947	963	3198.48	3.92e-11			141	PTHR32194	Proteasome B-type subunit	CEG37743	1	TCTCTWTGTAYCSTC	Inr+FPR	172	186	2705.76	1.15e-09
203	PTHR11278	Small ribosomal subunit protein eS7	PYU1_T014276	-2	CTCAGATCTGAGTCC	MEME-2	851	865	2667.26	3.12e-09			141	PTHR32194	Proteasome B-type subunit	CEG37743	4	TATAATTAAGGAGGGC	TATA	225	240	2866.11	3.14e-10
203	PTHR11278	Small ribosomal subunit protein eS7	PYU1_T014276	1	AATCGACTGGCCAGCAG	MEME-1	882	898	3011.14	1.35e-10			141	PTHR32194	Proteasome B-type subunit	HpaG814699	4	TATAATTAAGGAGGGC	TATA	409	424	1730.85	2.63e-07
229	PTHR21085	CHORISMATE SYNTHASE	CEG39361	3	CGGGACTTGAACCCGCA	MEME-3	816	832	3397.8	3.22e-11			141	PTHR32194	Proteasome B-type subunit	HpaG814699	1	TCTCTWTGTAYCSTC	Inr+FPR	526	540	2316.21	4.49e-08
229	PTHR21085	CHORISMATE SYNTHASE	CEG39361	2	CTCTGCCTTAGGAGGGC	MEME-2	835	851	3419.48	3.22e-11			141	PTHR32194	Proteasome B-type subunit	PHYSODRAFT_286698	1	TCTCTWTGTAYCSTC	Inr+FPR	132	146	2705.76	1.15e-09
229	PTHR21085	CHORISMATE SYNTHASE	CEG39361	1	GCGCCGTATCCATTGGG	MEME-1	853	869	3298.92	3.22e-11			141	PTHR32194	Proteasome B-type subunit	PHYSODRAFT_286698	4	TATAATTAAGGAGGGC	TATA	185	200	2866.11	3.14e-10
229	PTHR21085	CHORISMATE SYNTHASE	CEG39361	4	CCACGCGAGC	MEME-4	870	879	1955.64	4.98e-07			141	PTHR32194	Proteasome B-type subunit	PITG_09706	1	TCTCTWTGTAYCSTC	Inr+FPR	1	15	2705.76	1.15e-09
229	PTHR21085	CHORISMATE SYNTHASE	HpaG804157	3	CGGGACTTGAACCCGCA	MEME-3	741	757	3397.8	3.22e-11			141	PTHR32194	Proteasome B-type subunit	PITG_09706	4	TATAATTAAGGAGGGC	TATA	54	69	2866.11	3.14e-10
229	PTHR21085	CHORISMATE SYNTHASE	HpaG804157	2	CTCTGCCTTAGGAGGGC	MEME-2	760	776	3419.48	3.22e-11			141	PTHR32194	Proteasome B-type subunit	PYU1_T011788	1	TCTCTWTGTAYCSTC	Inr+FPR	445	459	2182.65	6.74e-08
229	PTHR21085	CHORISMATE SYNTHASE	HpaG804157	1	GCGCCGTATCCATTGGG	MEME-1	778	794	3298.92	3.22e-11			141	PTHR32194	Proteasome B-type subunit	PYU1_T011788	4	TATAATTAAGGAGGGC	TATA	635	650	1931.19	1.75e-07
229	PTHR21085	CHORISMATE SYNTHASE	HpaG804157	4	CCACGCGAGC	MEME-4	795	804	1955.64	4.98e-07			130	PTHR45635	ADP,ATP CARRIER PROTEIN 1-RELATED-RELATED	CEG37517	1	TCATYTWGGATTTTTC	Inr+FPR	946	961	2211.6	1.25e-07
229	PTHR21085	CHORISMATE SYNTHASE	PHYSODRAFT_497112	3	CGGGACTTGAACCCGCA	MEME-3	635	651	3397.8	3.22e-11			130	PTHR45635	ADP,ATP CARRIER PROTEIN 1-RELATED-RELATED	HpaG803263	1	TCATYTWGGATTTTTC	Inr+FPR	870	885	1473.85	2.85e-06
229	PTHR21085	CHORISMATE SYNTHASE	PHYSODRAFT_497112	2	CTCTGCCTTAGGAGGGC	MEME-2	654	670	3419.48	3.22e-11			130	PTHR45635	ADP,ATP CARRIER PROTEIN 1-RELATED-RELATED	PHYSODRAFT_289206	1	TCATYTWGGATTTTTC	Inr+FPR	983	998	2835.85	4.66e-10
229	PTHR21085	CHORISMATE SYNTHASE	PHYSODRAFT_497112	1	GCGCCGTATCCATTGGG	MEME-1	672	688	3298.92	3.22e-11			130	PTHR45635	ADP,ATP CARRIER PROTEIN 1-RELATED-RELATED	PITG_04868	1	TCATYTWGGATTTTTC	Inr+FPR	940	955	2835.85	4.66e-10
229	PTHR21085	CHORISMATE SYNTHASE	PHYSODRAFT_497112	4	CCACGCGAGC	MEME-4	689	698	1955.64	4.98e-07			130	PTHR45635	ADP,ATP CARRIER PROTEIN 1-RELATED-RELATED	PYU1_T007603	1	TCATYTWGGATTTTTC	Inr+FPR	939	954	2835.85	4.66e-10
229	PTHR21085	CHORISMATE SYNTHASE	PITG_01769	3	CGGGACTTGAACCCGCA	MEME-3	645	661	3397.8	3.22e-11			130	PTHR45624	MITOCHONDRIAL BASIC AMINO ACIDS TRANSPORTER-RELATED	PBRA_005298	1	TCATYTWGGATTTTTC	Inr+FPR	36	51	1473.85	2.85e-06
229	PTHR21085	CHORISMATE SYNTHASE	PITG_01769	2	CTCTGCCTTAGGAGGGC	MEME-2	664	680	3419.48	3.22e-11			172	PTHR43511	UTP--GLUCOSE-1-PHOSPHATE URIDYLYLTRANSFERASE	CEG38253	8	YCYAAAGCTTCGAATTT	Inr + FPR	296	312	2333.97	2.99e-08
229	PTHR21085	CHORISMATE SYNTHASE	PITG_01769	1	GCGCCGTATCCATTGGG	MEME-1	682	698	3298.92	3.22e-11			172	PTHR43511	UTP--GLUCOSE-1-PHOSPHATE URIDYLYLTRANSFERASE	HpaG803442	8	YCYAAAGCTTCGAATTT	Inr + FPR	167	183	2179.83	7.39e-08
229	PTHR21085	CHORISMATE SYNTHASE	PITG_01769	4	CCACGCGAGC	MEME-4	699	708	1955.64	4.98e-07			172	PTHR43511	UTP--GLUCOSE-1-PHOSPHATE URIDYLYLTRANSFERASE	PHYSODRAFT_510163	8	YCYAAAGCTTCGAATTT	Inr + FPR	651	667	2906.49	1.05e-10
229	PTHR21085	CHORISMATE SYNTHASE	PYU1_T005723	1	GCGCCGTATCCATTGGG	MEME-1	522	538	2461.92	7.02e-10			172	PTHR43511	UTP--GLUCOSE-1-PHOSPHATE URIDYLYLTRANSFERASE	PITG_16359	8	YCYAAAGCTTCGAATTT	Inr + FPR	798	814	2642.25	2.78e-09
229	PTHR21085	CHORISMATE SYNTHASE	PYU1_T005723	4	CCACGCGAGC	MEME-4	881	890	1520.4	2.45e-06			172	PTHR43511	UTP--GLUCOSE-1-PHOSPHATE URIDYLYLTRANSFERASE	PYU1_T012682	8	YCYAAAGCTTCGAATTT	Inr + FPR	243	259	2080.74	1.25e-07
240	PTHR19375	HEAT SHOCK PROTEIN 70KDA	CEG39562	1	TCVGCRATCTTGACKT	MEME-1	277	292	2793.12	9.4e-10			322	PTHR10984	ENDOPLASMIC RETICULUM-GOLGI INTERMEDIATE COMPARTMENT PROTEIN	CEG41425	8	TTAATKAKDTTCWAVAG	TATA	583	599	3111.26	6.9e-10
240	PTHR19375	HEAT SHOCK PROTEIN 70KDA	CEG39562	2	CGTCMTTGTAGTAKG	MEME-2	485	499	2464.68	1.03e-08			322	PTHR10984	ENDOPLASMIC RETICULUM-GOLGI INTERMEDIATE COMPARTMENT PROTEIN	PITG_14110	8	TTAATKAKDTTCWAVAG	TATA	644	660	2878.72	7.72e-09
240	PTHR19375	HEAT SHOCK PROTEIN 70KDA	HpaG801537	1	TCVGCRATCTTGACKT	MEME-1	76	91	2252.16	2.13e-08			322	PTHR10984	ENDOPLASMIC RETICULUM-GOLGI INTERMEDIATE COMPARTMENT PROTEIN	PYU1_T014708	8	TTAATKAKDTTCWAVAG	TATA	575	591	2994.99	3.83e-09
240	PTHR19375	HEAT SHOCK PROTEIN 70KDA	HpaG801537	2	CGTCMTTGTAGTAKG	MEME-2	404	418	2221.8	6.49e-08			142	PTHR10485	MITOCHONDRIAL IMPORT INNER MEMBRANE TRANSLOCASE SUBUNIT TIM-17	CEG37744	1	AATRAAVGCGTCCTTGW	Inr + FPR	158	174	2611.96	5.71e-09
240	PTHR19375	HEAT SHOCK PROTEIN 70KDA	PHYSODRAFT_482793	1	TCVGCRATCTTGACKT	MEME-1	168	183	2837.28	4.24e-10			142	PTHR10485	MITOCHONDRIAL IMPORT INNER MEMBRANE TRANSLOCASE SUBUNIT TIM-17	HpaG806559	1	AATRAAVGCGTCCTTGW	Inr + FPR	797	813	2312.8	3.75e-08
240	PTHR19375	HEAT SHOCK PROTEIN 70KDA	PHYSODRAFT_482793	2	CGTCMTTGTAGTAKG	MEME-2	376	390	2652.36	7.72e-10			142	PTHR10485	MITOCHONDRIAL IMPORT INNER MEMBRANE TRANSLOCASE SUBUNIT TIM-17	PHYSODRAFT_511066	1	AATRAAVGCGTCCTTGW	Inr + FPR	64	80	2822.48	5.59e-10
240	PTHR19375	HEAT SHOCK PROTEIN 70KDA	PITG_11252	1	TCVGCRATCTTGACKT	MEME-1	228	243	2837.28	4.24e-10			142	PTHR10485	MITOCHONDRIAL IMPORT INNER MEMBRANE TRANSLOCASE SUBUNIT TIM-17	PITG_09707	1	AATRAAVGCGTCCTTGW	Inr + FPR	4	20	2900.04	1.29e-10
240	PTHR19375	HEAT SHOCK PROTEIN 70KDA	PITG_11252	2	CGTCMTTGTAGTAKG	MEME-2	436	450	2652.36	7.72e-10			142	PTHR10485	MITOCHONDRIAL IMPORT INNER MEMBRANE TRANSLOCASE SUBUNIT TIM-17	PYU1_T011777	1	AATRAAVGCGTCCTTGW	Inr + FPR	719	735	2357.12	2.98e-08
240	PTHR19375	HEAT SHOCK PROTEIN 70KDA	PYU1_T013960	1	TCVGCRATCTTGACKT	MEME-1	503	518	2572.32	6.9e-09			295	PTHR11210	RING BOX	CEG40758	2	TCAHBTTTCCCHTTA	Inr + FPR	702	716	2104.27	2.41e-07
240	PTHR19375	HEAT SHOCK PROTEIN 70KDA	PYU1_T013960	2	CGTCMTTGTAGTAKG	MEME-2	786	800	2001	1.43e-07			295	PTHR11210	RING BOX	HpaG807549	2	TCAHBTTTCCCHTTA	Inr + FPR	708	722	2237.35	7.66e-08
318	PTHR10681	THIOREDOXIN PEROXIDASE	CEG41314	1	TCACCACCGARTAGAAG	MEME-1	845	861	2832.73	1.71e-09			295	PTHR11210	RING BOX	PHYSODRAFT_285454	2	TCAHBTTTCCCHTTA	Inr + FPR	871	885	1915.74	9.68e-07
318	PTHR10681	THIOREDOXIN PEROXIDASE	HpaG803031	1	TCACCACCGARTAGAAG	MEME-1	705	721	2832.73	1.71e-09			295	PTHR11210	RING BOX	PITG_01524	2	TCAHBTTTCCCHTTA	Inr + FPR	930	944	2237.35	7.66e-08
318	PTHR10681	THIOREDOXIN PEROXIDASE	PHYSODRAFT_353788	1	TCACCACCGARTAGAAG	MEME-1	707	723	3180.24	4.77e-11			295	PTHR11210	RING BOX	PYU1_T012075	2	TCAHBTTTCCCHTTA	Inr + FPR	861	875	1760.48	1.99e-06
318	PTHR10681	THIOREDOXIN PEROXIDASE	PITG_15504	1	TCACCACCGARTAGAAG	MEME-1	718	734	3180.24	4.77e-11			529	PTHR11239	DNA-DIRECTED RNA POLYMERASE	CEG46280	9	TACARNAKTTCTYGAGG	Inr + FPR	158	174	2435.94	1.56e-08
318	PTHR10681	THIOREDOXIN PEROXIDASE	PYU1_T007224	1	TCACCACCGARTAGAAG	MEME-1	336	352	2799.1	2.24e-09			529	PTHR11239	DNA-DIRECTED RNA POLYMERASE	HpaG801854	9	TACARNAKTTCTYGAGG	Inr + FPR	906	922	1960.36	2.62e-07
329	PTHR23222	PROHIBITIN	CEG41583	1	ACGTGACAGCAAAGTCA	MEME-1	255	271	3038.74	5.81e-11			529	PTHR11239	DNA-DIRECTED RNA POLYMERASE	PHYSODRAFT_491179	9	TACARNAKTTCTYGAGG	Inr + FPR	111	127	2756.68	2e-10
329	PTHR23222	PROHIBITIN	HpaG810258	1	ACGTGACAGCAAAGTCA	MEME-1	98	114	3038.74	5.81e-11			529	PTHR11239	DNA-DIRECTED RNA POLYMERASE	PITG_16526	9	TACARNAKTTCTYGAGG	Inr + FPR	142	158	2557.6	4.2e-09
329	PTHR23222	PROHIBITIN	PHYSODRAFT_354996	1	ACGTGACAGCAAAGTCA	MEME-1	235	251	2663.72	2.21e-09			529	PTHR11239	DNA-DIRECTED RNA POLYMERASE	PYU1_T002895	9	TACARNAKTTCTYGAGG	Inr + FPR	109	125	1993.54	2.33e-07
329	PTHR23222	PROHIBITIN	PITG_09512	1	ACGTGACAGCAAAGTCA	MEME-1	280	296	2509.3	3.71e-09
329	PTHR23222	PROHIBITIN	PYU1_T007973	1	ACGTGACAGCAAAGTCA	MEME-1	300	316	1825.44	5.3e-08
344	PTHR10917	DNA-DIRECTED RNA POLYMERASES I, II, AND III SUBUNIT RPABC3	CEG41975	2	AGGWAGTCGTACTSSTC	MEME-2	682	698	2111	1.78e-08
344	PTHR10917	DNA-DIRECTED RNA POLYMERASES I, II, AND III SUBUNIT RPABC3	CEG41975	1	AGCRCGATCTTGAA	MEME-1	811	824	2125.2	9.29e-08
344	PTHR10917	DNA-DIRECTED RNA POLYMERASES I, II, AND III SUBUNIT RPABC3	HpaG814617	1	AGCRCGATCTTGAA	MEME-1	603	616	2606.8	4.18e-09
344	PTHR10917	DNA-DIRECTED RNA POLYMERASES I, II, AND III SUBUNIT RPABC3	HpaG814617	2	AGGWAGTCGTACTSSTC	MEME-2	618	634	2715.8	1.16e-09
344	PTHR10917	DNA-DIRECTED RNA POLYMERASES I, II, AND III SUBUNIT RPABC3	PHYSODRAFT_355025	1	AGCRCGATCTTGAA	MEME-1	681	694	2606.8	4.18e-09
344	PTHR10917	DNA-DIRECTED RNA POLYMERASES I, II, AND III SUBUNIT RPABC3	PHYSODRAFT_355025	2	AGGWAGTCGTACTSSTC	MEME-2	696	712	2895	1.91e-10
344	PTHR10917	DNA-DIRECTED RNA POLYMERASES I, II, AND III SUBUNIT RPABC3	PITG_09712	2	AGGWAGTCGTACTSSTC	MEME-2	577	593	2637.4	2.41e-09
344	PTHR10917	DNA-DIRECTED RNA POLYMERASES I, II, AND III SUBUNIT RPABC3	PITG_09712	1	AGCRCGATCTTGAA	MEME-1	678	691	1890	1.82e-07
344	PTHR10917	DNA-DIRECTED RNA POLYMERASES I, II, AND III SUBUNIT RPABC3	PYU1_T011774	1	AGCRCGATCTTGAA	MEME-1	511	524	2606.8	4.18e-09
344	PTHR10917	DNA-DIRECTED RNA POLYMERASES I, II, AND III SUBUNIT RPABC3	PYU1_T011774	2	AGGWAGTCGTACTSSTC	MEME-2	526	542	2939.8	4.77e-11
373	PTHR10553	SMALL NUCLEAR RIBONUCLEOPROTEIN	CEG42574	7	TTCTGRTTCATCTTCTT	MEME-7	455	471	2503.35	3.06e-09
373	PTHR10553	SMALL NUCLEAR RIBONUCLEOPROTEIN	HpaG802700	7	TTCTGRTTCATCTTCTT	MEME-7	357	373	3082.11	1.91e-10
373	PTHR10553	SMALL NUCLEAR RIBONUCLEOPROTEIN	PHYSODRAFT_514215	7	TTCTGRTTCATCTTCTT	MEME-7	279	295	3126.63	8.62e-11
373	PTHR10553	SMALL NUCLEAR RIBONUCLEOPROTEIN	PITG_15653	7	TTCTGRTTCATCTTCTT	MEME-7	408	424	3126.63	8.62e-11
373	PTHR10553	SMALL NUCLEAR RIBONUCLEOPROTEIN	PYU1_T007840	7	TTCTGRTTCATCTTCTT	MEME-7	111	127	2937.42	3.48e-10
414	PTHR43321	GLUTAMATE DECARBOXYLASE	CEG43673	1	TTGCAGGACGAGGTGCA	MEME-1	700	716	2322.96	1.05e-08
414	PTHR43321	GLUTAMATE DECARBOXYLASE	HpaG812287	1	TTGCAGGACGAGGTGCA	MEME-1	26	42	3082.65	3.92e-11
414	PTHR43321	GLUTAMATE DECARBOXYLASE	PHYSODRAFT_353780	1	TTGCAGGACGAGGTGCA	MEME-1	507	523	2873.46	4.51e-10
414	PTHR43321	GLUTAMATE DECARBOXYLASE	PITG_02594	1	TTGCAGGACGAGGTGCA	MEME-1	596	612	3082.65	3.92e-11
414	PTHR43321	GLUTAMATE DECARBOXYLASE	PYU1_T004494	1	TTGCAGGACGAGGTGCA	MEME-1	637	653	2124.78	1.9e-08
429	PTHR18860	14-3-3 protein	CEG44130	1	GMYGACCATCACTCT	MEME-1	840	854	2537.76	5.64e-09
429	PTHR18860	14-3-3 protein	HpaG803710	1	GMYGACCATCACTCT	MEME-1	810	824	2736.84	7.72e-10
429	PTHR18860	14-3-3 protein	PHYSODRAFT_353822	1	GMYGACCATCACTCT	MEME-1	880	894	2548.82	3.75e-09
429	PTHR18860	14-3-3 protein	PITG_19017	1	GMYGACCATCACTCT	MEME-1	926	940	2393.98	1.58e-08
429	PTHR18860	14-3-3 protein	PYU1_T003542	1	GMYGACCATCACTCT	MEME-1	2	16	2405.04	1.52e-08
513	PTHR10625	HISTONE DEACETYLASE HDAC1-RELATED	CEG45902	1	TTGTTGGWGWRGAACGG	MEME-1	690	706	2285.36	2.75e-08
513	PTHR10625	HISTONE DEACETYLASE HDAC1-RELATED	HpaG809060	1	TTGTTGGWGWRGAACGG	MEME-1	242	258	2753.24	1.01e-09
513	PTHR10625	HISTONE DEACETYLASE HDAC1-RELATED	PHYSODRAFT_311727	1	TTGTTGGWGWRGAACGG	MEME-1	169	185	2987.18	5.81e-11
513	PTHR10625	HISTONE DEACETYLASE HDAC1-RELATED	PITG_04499	1	TTGTTGGWGWRGAACGG	MEME-1	215	231	2987.18	5.81e-11
513	PTHR10625	HISTONE DEACETYLASE HDAC1-RELATED	PYU1_T009921	1	TTGTTGGWGWRGAACGG	MEME-1	667	683	2151.68	4.06e-08
525	PTHR43102	SLR1143 PROTEIN	CEG46180	1	CAGTTTGGCGGCCGACT	MEME-1	721	737	3143.38	3.22e-11
525	PTHR43102	SLR1143 PROTEIN	HpaG807827	1	CAGTTTGGCGGCCGACT	MEME-1	702	718	2812.78	4.08e-10
525	PTHR43102	SLR1143 PROTEIN	PHYSODRAFT_354133	1	CAGTTTGGCGGCCGACT	MEME-1	807	823	3143.38	3.22e-11
525	PTHR43102	SLR1143 PROTEIN	PITG_12327	1	CAGTTTGGCGGCCGACT	MEME-1	962	978	3143.38	3.22e-11
525	PTHR43102	SLR1143 PROTEIN	PYU1_T014002	1	CAGTTTGGCGGCCGACT	MEME-1	31	47	1997.3	7.16e-09

## Sheet: legend_4
Table 1: This table presents genomic positions of de novo predicted cis-regulatory motifs identified using the MEME Suite and mapped using MAST across five oomycete species. These motifs were not matched to any known database entries but are conserved in the same gene family (argininosuccinate synthase, Cluster 176), suggesting potential regulatory relevance. Each row includes the gene cluster ID…
Table 2: This table summarizes conserved de novo motif occurrences that were found using MEME and confirmed by MAST, and additionally matched with transcription factor binding sites described in prior literature (e.g., TATA box, CCAAT box). The motifs are located in the upstream regions of adenylosuccinate lyase genes (Cluster 99) across five species, supporting their potential role in shared tra…

[truncated: 9 more sheets: upstream_coordinates, legend_5, JASPAR_ZOOPS_GOMO, legend_6, Known_motifs_proteins, legend_7, Protein_motifs_coordinates, legend_8, Time_series_expreession]
